# Supplementary material
Source: PubMed Central journal article supplement (PMC5949858)
Supplement: SC-006-C5SC02102B-s001.pdf [file SC-006-C5SC02102B-s001.pdf]

## Electronic Supporting Information

### Protonation state of the $\text{Cu}_4\text{S}_2\text{Cu}_Z$ site in nitrous oxide reductase: redox dependence and insight into reactivity

Esther M. Johnston, Simone Dell'Acqua, Sofia R. Pauleta, Isabel Moura and Edward I. Solomon

#### S1 Experimental Methodology

##### S1.1 Materials

All reagents were purchased from Sigma-Aldrich and of the highest grade commercially available. Deuterated water (99.9%), deuterated sodium hydroxide (99+%) and deuterated glycerol (99+% D) were obtained from Cambridge Isotopes.

Nitrous oxide reductase ( $\text{N}_2\text{OR}$ ) was isolated from *Marinobacter hydrocarbonoclasticus* 617 (formerly *Pseudomonas nautica*) grown under microaerobic conditions in the presence of nitrate, as described previously.<sup>1</sup>  $\text{MhN}_2\text{OR}$  was isolated after two chromatographic steps that were performed aerobically, without added reductants, in Tris-HCl buffer at pH 7.6, as described by Dell'Acqua et. al.<sup>1</sup> These purification conditions were shown to maximize the amount of  $\text{Cu}_4\text{S}_2\text{Cu}_Z$  content relative to  $\text{Cu}_4\text{S}\text{Cu}_Z^*$  in the purified enzyme. Samples containing larger amounts of  $\text{Cu}_Z^*$  were purified in parallel with three chromatographic purification steps from a batch of cells grown under anaerobic conditions in the presence of nitrate, and that had been stored at  $-80^\circ\text{C}$  for a long period.<sup>1,2</sup> The total  $\text{MhN}_2\text{OR}$  concentration was determined by bicinchoninic acid (BCA) assay with bovine serum albumin as the protein standard; copper content was determined by the 2,2'-biquinoline assay, as previously described.<sup>1</sup>  $\text{MhN}_2\text{OR}$  isolated by the first method had a copper content of  $6.4 \pm 0.2$  Cu per monomer, while  $\text{MhN}_2\text{OR}$  isolated by the second method contained  $6.2 \pm 0.7$  Cu per monomer, consistent with full occupancy of the copper sites in both the protein samples used. The total spin intensity quantified by EPR for the dithionite reduced  $\text{MhN}_2\text{OR}$  samples was one spin per monomer, consistent with the presence of  $\text{Cu}_Z$  or  $\text{Cu}_Z^*$  in the 1-hole redox state and reduced  $\text{Cu}_A$ . The percentage of  $\text{Cu}_Z$  versus  $\text{Cu}_Z^*$  in the samples used for this study was determined by EPR spin quantitation (Figure S1). The total spin of a dithionite reduced enzyme sample (where  $\text{Cu}_A$  and 2-hole  $\text{Cu}_Z$  are 1 electron reduced and only both 1-hole  $\text{Cu}_Z$  and 1-hole  $\text{Cu}_Z^*$  contribute to the total spin)<sup>2,3</sup> was compared to the total spin after 2 hours of reduction by 100 equivalents of reduced methyl viologen (which reduces 1-hole  $\text{Cu}_Z^*$  to  $4\text{Cu}^{\text{I}}$  but leaves 1-hole  $\text{Cu}_Z$  in the  $3\text{Cu}^{\text{I}}\text{Cu}^{\text{II}}$  state).<sup>2</sup> Samples purified with high amounts of  $\text{Cu}_Z$  contained  $60 \pm 10\%$   $\text{Cu}_Z$ , while samples purified to obtain more  $\text{Cu}_Z^*$  contained  $10 \pm 10\%$   $\text{Cu}_Z$ . Purified  $\text{MhN}_2\text{OR}$  in 100 mM Tris-HCl buffer at pH 7.6 was stored frozen at  $-80^\circ\text{C}$  in small aliquots and thawed just prior to the preparation of spectroscopic samples.

##### S1.2 Spectroscopic studies

Spectroscopic samples of 1-hole and 2-hole  $\text{Cu}_Z$  were prepared in a glove box under  $\text{N}_2$  atmosphere. Samples of 1-hole  $\text{Cu}_Z$  were prepared from  $\text{MhN}_2\text{OR}$  (60%  $\text{Cu}_Z$

and 40% Cu<sub>Z</sub>\*) that had been incubated with 100 equivalents of reduced methyl viologen. The methyl viologen was removed using a PD-10 Sephadex G-25 medium (GE HealthCare) desalting column with 100 mM phosphate at pH 7.6 as the elution buffer. The protein-containing column fractions were concentrated by centrifugation using Amicon Ultra concentrators with an Ultracell regenerated cellulose membrane (Millipore). For pH dependence studies, during the concentration step samples were buffer exchanged to 100 mM MES pD 6.0, 100 mM phosphate pD 7.6, or 100 mM CAPS pD 10. The total spin intensity observed by EPR was not changed by buffer exchanging to different pHs. To determine the effect of deuteration, samples were prepared in parallel at pH/pD 7.6 and pH/pD 10. Samples of 2-hole Cu<sub>Z</sub> were prepared by reducing *MhN*<sub>2</sub>OR (60±10% Cu<sub>Z</sub>, 40±10% Cu<sub>Z</sub>\*) with 10 equivalents of sodium ascorbate, which reduces the Cu<sub>A</sub> site rapidly and the 2-hole Cu<sub>Z</sub> site very slowly, and spectra were collected within 1 hour so that minimal reduction of 2-hole Cu<sub>Z</sub> was observed. In parallel, *MhN*<sub>2</sub>OR samples containing 90±10% Cu<sub>Z</sub>\* were reduced with 10 equivalents of sodium ascorbate to obtain the spectral features of 1-hole Cu<sub>Z</sub>\*. Corrected absorption spectra of 2-hole Cu<sub>Z</sub> were obtained by subtracting the spectral contribution of the appropriate concentration of 1-hole Cu<sub>Z</sub>\*. Ascorbate reduced samples of *MhN*<sub>2</sub>OR containing Cu<sub>Z</sub> were buffer exchanged by centrifugation to 100 mM MES pD 6.0, 100 mM phosphate pD 7.6, or 100 mM CAPS pD 10 for pH dependence experiments. Typical *MhN*<sub>2</sub>OR concentrations used for spectroscopic samples were 0.1-0.3 mM for absorption, MCD and EPR, and up to 0.5 mM for resonance Raman. The concentration of the dimer *MhN*<sub>2</sub>OR was determined using the extinction coefficient of 7100 M<sup>-1</sup> cm<sup>-1</sup> at 640 nm for the dimer in the dithionite reduced spectrum in the purified protein and corrected according to the volume changes involved in spectroscopic sample preparation.<sup>4</sup>

Absorption spectra were acquired in a Teflon-sealed 3 mm small volume quartz cell at room temperature using an Agilent 8453 UV-visible spectrophotometer with deuterium and tungsten sources. MCD samples were prepared by mixing protein samples in deuterated buffer 1:1 with deuterated glycerol. MCD spectra were collected on CD spectropolarimeters (Jasco J810 with an S20 PMT detector for the 300-900 nm region and a Jasco J730 with an InSb detector for the 600-2000 nm region) with sample compartments modified to insert magnetocryostats (Oxford Instruments SM4-7T). Low temperature absorption spectra were additionally obtained from the samples used for MCD using a double-beam Cary 500 spectrophotometer modified to accommodate a liquid helium cryostat (Janis Research Super Vari-Temp). Low temperature absorption spectra were corrected by subtracting the background spectrum from a cell containing a 50:50 mixture of buffer and deuterated glycerol and an additional scattering correction to account for the differences in glassing between the protein and background samples. EPR and resonance Raman samples were frozen in 4 mm diameter quartz sample tubes. EPR spectra were collected using a Bruker EMX spectrometer with an ER 041 XG microwave bridge, and an ER4102ST sample cavity for X-band and an ER 051 QR microwave bridge, an ER 5106QT resonator, and an Oxford continuous-flow CF935 cryostat for Q-band. X-band samples were run at 77 K in a liquid nitrogen finger dewar. Q-band samples were run at 77 K using a cooling He gas flow. EPR spectra were baseline corrected using WinEPR (Bruker) and simulated using Simfonia (Bruker). Resonance Raman spectra were collected using a series of lines from a Kr<sup>+</sup> ion laser (Coherent 190CK), a Ti-sapphire laser (M-squared SolsTice, pumped by a 12 W Lighthouse

Photonics Sprout diode pumped solid state laser), and a Dye laser (Rhodamine 6G, Coherent 699) with incident power of 20-30 mW arranged in a 130° backscattering configuration. The scattered light was dispersed through a triple monochromator (Spex 1877 CP, with 1200, 1800, and 2400 grooves mm<sup>-1</sup> gratings) and detected with a back-illuminated CCD camera (Andor iDus model). Resonance Raman samples were immersed in a liquid nitrogen finger dewar at 77 K. The spectrum of black carbon in an identical quartz EPR tube was subtracted to remove the spectral contribution from quartz scattering. The intensity of the ice peak at ~229 cm<sup>-1</sup> was used to normalize the intensities of vibrations to obtain resonance Raman excitation profiles.

### S1.3 Computational Details

A computational model of Cu<sub>Z</sub> was built from the atomic coordinates of the crystal structure of *Pseudomonas stutzeri* N<sub>2</sub>OR, the only known structure of the Cu<sub>4</sub>S<sub>2</sub> cluster (PDB ID 3SBP, resolution 1.7 Å).<sup>5</sup> The model included the Cu<sub>4</sub>S<sub>2</sub> core and 7 ligating His residues, where the α carbon and distal nitrogen were constrained at their crystallographic positions. A computational model for Cu<sub>Z</sub>\* with a hydroxide bridging ligand and identical α carbon and distal nitrogen constraints was constructed from the crystal structure of *Paracoccus denitrificans* N<sub>2</sub>OR (*Pd*N<sub>2</sub>OR, PDB ID 1FWX).<sup>6</sup> Two larger structural models were also optimized: (1) including a second sphere Lys-Glu salt bridge near the Cu<sub>I</sub>-Cu<sub>IV</sub> edge in both sites (Lys397 for *Pd*N<sub>2</sub>OR and Lys454 for *Ps*N<sub>2</sub>OR)<sup>7</sup> for the 1-hole redox state of Cu<sub>Z</sub> with an SH<sup>-</sup> edge ligand and for 1-hole Cu<sub>Z</sub>\* with an OH<sup>-</sup> edge ligand and (2) including two second sphere carboxylate residues, Asp127 and Asp240 (which hydrogen bond to the His ligands of Cu<sub>I</sub> and Cu<sub>II</sub>), in optimizations of 1-hole and 2-hole Cu<sub>Z</sub> with SH<sup>-</sup> or S<sup>2-</sup> edge ligation. Including the second sphere residues did not significantly perturb the core Cu-S bond lengths (Table S3), geometries or the spin distribution of the cluster, so the smaller computational model lacking second sphere residues was used for the analysis of the spectroscopic properties of Cu<sub>Z</sub>. Calculations were performed using Gaussian 09 (version d01).<sup>8</sup> Molecular structures and frequencies were visualized using Avogadro, an open source molecular builder and visualization tool (Version 1.1.1).<sup>9</sup> VMD 1.9.1 was used to visualize molecular orbitals,<sup>10</sup> and QMForge was used to obtain Mulliken spin populations of different orbitals and to analyze TD-DFT calculations.<sup>11</sup> Geometry optimizations were performed using the B3LYP functional, the TZVP basis set on all core atoms (Cu<sub>4</sub>S<sub>2</sub>) and the ligating His nitrogens, and the SV basis set on all remaining atoms. The optimizations of the large model (2), including two second sphere Asp residues, were additionally performed using a larger basis set with TZVP on the Cu<sub>4</sub>S<sub>2</sub> core and all His ring heavy atoms. The resulting structures, spin distributions, and relative energies of the singlet and triplet ground states did not differ significantly from the smaller basis set optimizations (see Tables S4-S6), thus the structures optimized with TZVP only on the Cu<sub>4</sub>S<sub>2</sub> core and ligating nitrogens were used for frequency, TD DFT, and single point calculations. Optimizations, single points, frequencies, and TD-DFT calculations were performed with PCM values of 4.0 and 10.0 and no significant change in the spin distribution, frequencies, or TD-DFT was observed. Spin distributions, frequencies, and TD-DFT results reported are from calculations with a PCM of 4.0. TD-DFT calculations were additionally performed with the functional B98, which has previously shown to predict the experimental spectrum of a Cu<sub>3</sub>S<sub>2</sub> model complex.<sup>12</sup> As described in the Analysis,

models with an edge  $S^{2-}$  or  $SH^-$  were optimized for both 1-hole and 2-hole redox states and the 2-hole models were optimized in both triplet and broken symmetry singlet spin states (the singlet states were always lower in energy). This was further tested with the functionals M06L, M06, and TPSSh, which all predict that singlet ground states are lower in energy by at least 5 kcal/mol for the 2-hole redox state; however, these functionals predict a restricted singlet ground state wavefunction for the 2-hole  $Cu_Z$  site, while B3LYP predicts a more chemically reasonable spin polarized wavefunction.

To determine the relative energy of deprotonation ( $\Delta\Delta E$ ) of the edge  $SH^-$  in the 2-hole versus 1-hole redox state, the larger structural models including two second sphere Asp residues were used. The directly deprotonated versions of the 2Asp model (with loss of  $H^+$  to solvent) were considered and the energies of an internal proton transfer from the edge  $SH^-$  to Asp127 were also calculated for the 1-hole and 2-hole redox states. The PCM dependence of the  $\Delta\Delta E$  of deprotonation was also evaluated by obtaining the singlet point energies with different PCM values for structures optimized with a PCM of 4.0. The  $\Delta G$  for deprotonation of 1-hole  $Cu_Z$  was also approximated from frequency calculations using structures with identical fixed atom constraints and the same number and magnitude for the imaginary frequencies associated with the fixed atom constraints. To minimize the error introduced into the vibrational energy correction by the fixed atom constraints, the masses of the fixed atoms were artificially increased until the calculated  $\Delta G$  correction showed no further significant dependence on the fixed atom masses ( $\sim 200$  Da). The resulting  $\Delta G$  was very similar to the calculated  $\Delta E$ , indicating that the energy differences are electronic in origin.

## S2 Supporting Figures, Tables, and Schemes

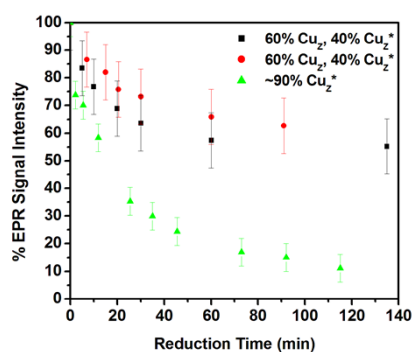

Figure S1: Methyl viologen reduction of three dithionite reduced samples of  $N_2OR$  to quantify the %  $Cu_Z$  from the % spin remaining after reduction. Black and red:  $N_2OR$  prepared with two aerobic chromatographic steps (“Form I”), containing  $\sim 60\%$   $Cu_Z$  and  $\sim 40\%$   $Cu_Z^*$ . Green:  $N_2OR$  prepared with three aerobic chromatographic steps (“Form II”), containing  $\sim 90\%$   $Cu_Z^*$  and  $\sim 10\%$   $Cu_Z$ .

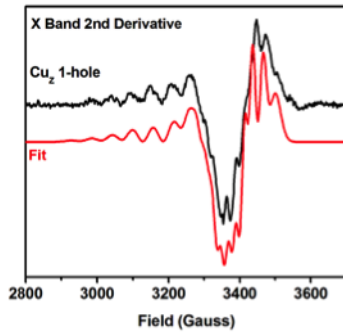

Figure S2: Second derivative (black) of the X band EPR spectrum of 1-hole  $\text{Cu}_Z$  at 77 K, 9.6349 GHz, with simulation in red.

| Band | 1-hole $\text{Cu}_Z$            |                                    |                   | 1-hole $\text{Cu}_Z^*$          |                                    |                    |
|------|---------------------------------|------------------------------------|-------------------|---------------------------------|------------------------------------|--------------------|
|      | <i>Energy (cm<sup>-1</sup>)</i> | <i>C<sub>0</sub>/D<sub>0</sub></i> | <i>Assignment</i> | <i>Energy (cm<sup>-1</sup>)</i> | <i>C<sub>0</sub>/D<sub>0</sub></i> | <i>Assignment</i>  |
| 1    | 8900                            | -0.137                             | d-d               | 8000                            | -0.016                             | $\text{Cu}_I dz^2$ |
| 2    | 11400                           | ---                                | IT                | 10000                           | ----                               | IT                 |
| 3    | 12000                           | -1.565                             | d-d               | 11100                           | -0.218                             | $\text{Cu}_I dxz$  |
| 4    | 13100                           | -0.054                             | d-d               | 12900                           | -0.194                             | $\text{Cu}_I dyz$  |
| 5    | 14600                           | -0.273                             | S $p_y'$          | 14300                           | -0.327                             | S $p_y'$           |
| 6    | 15800                           | 0.565                              | S $p_x'$          | 15700                           | 0.196                              | S $p_x'$           |
| 7    | 16900                           | 0.144                              | S $p_z'$          | 16500                           | 0.091                              | S $p_z'$           |
| 8    |                                 |                                    |                   | 18000                           | 0.170                              | $\text{Cu}_I dxy$  |
| 9    | 18500                           | ---                                | His $\pi_1$       | 19800                           | -0.029                             | His $\pi_1$        |
| 10   | 21400                           | ---                                | His $\pi_1$       | 21000                           | -0.045                             | His $\pi_1$        |
| 11   | 22200                           | -0.256                             | His $\pi_1$       | 22300                           | 0.193                              | His $\pi_1$        |
| 12   | 25900                           | -0.027                             | His $\pi_1$       | 24000                           | -0.047                             | His $\pi_1$        |
| 13   | 28800                           | -0.005                             | His $\pi_2$       | 28100                           | -0.002                             | His $\pi_2$        |
| 14   | 31600                           | 0.005                              | His $\pi_2$       |                                 |                                    |                    |

Table S1: Transition energies,  $C_0/D_0$  ratios, and assignments from simultaneous fitting of the low temperature absorption and MCD spectra of 1-hole  $\text{Cu}_Z$  and 1-hole  $\text{Cu}_Z^*$  (values and assignments for  $\text{Cu}_Z^*$  reproduced from Ref. <sup>7</sup>).

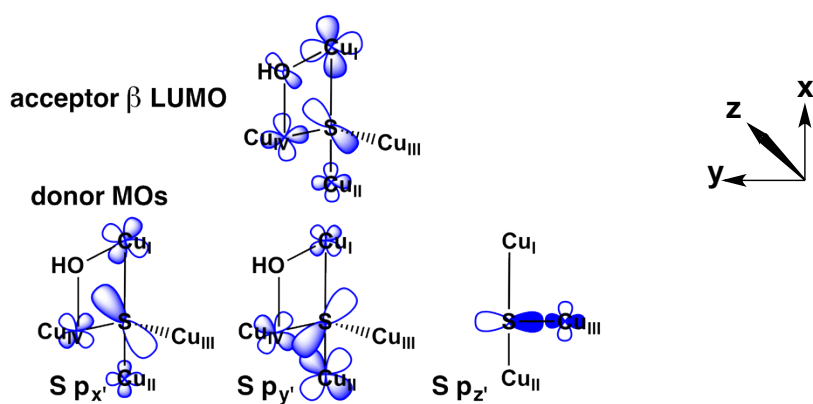

Scheme S1: Simplified acceptor and donor MOs for sulfide charge transfer transitions in resting  $Cu_Z^*$ , derived from DFT calculations of the  $Cu_Z^*$  cluster with a hydroxide bridged edge (B3LYP, tzvp on  $Cu_4SON_7$ , sv on remainder, PCM=4.0).

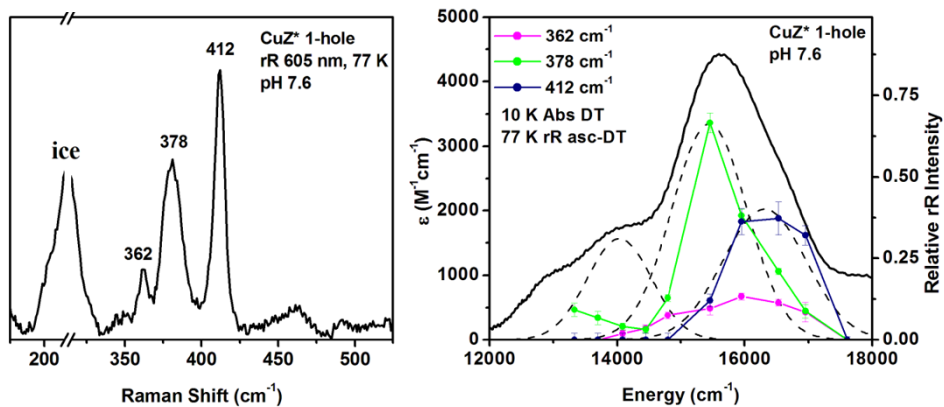

Figure S3: Resonance Raman spectrum of resting  $\text{Cu}_Z^*$  at 77 K and 605 nm excitation; excitation profile of resting  $\text{Cu}_Z^*$ . Reproduced from Ref. <sup>7</sup>.

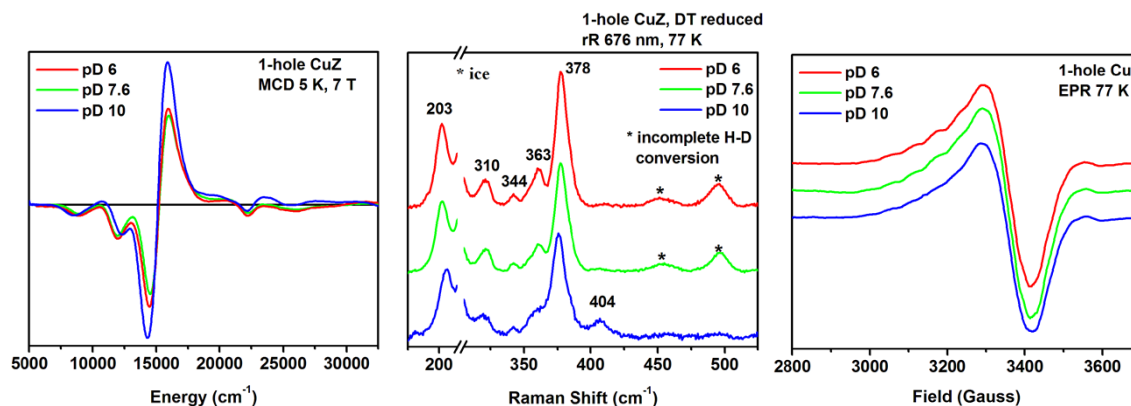

Figure S4: Lack of pH dependence of the MCD, resonance Raman, and EPR spectra of 1-hole  $\text{Cu}_Z$  at pD 6 (red), pD 7.6 (green) and pD 10 (blue). Note that the presence of weak S-H bends in the resonance Raman spectra at pD 6 and pD 7.6 is due to incomplete deuteration of the samples.

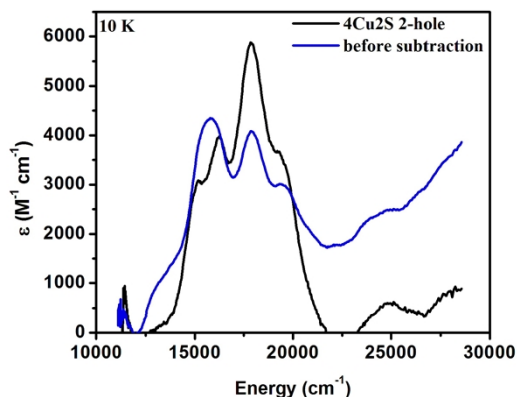

Figure S5: Absorption spectrum of 2-hole  $\text{Cu}_Z$  at 10 K, after ascorbate reduction and before (blue) or after (black) subtraction of the spectral contribution of 1-hole  $\text{Cu}_Z^*$ .

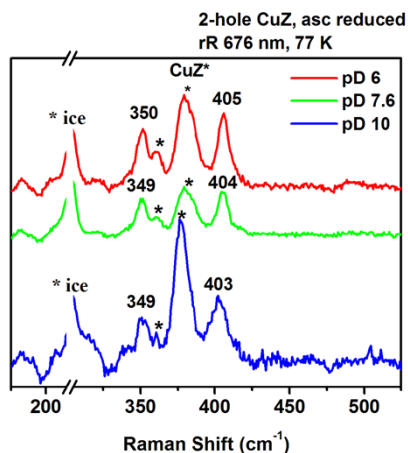

Figure S6: Resonance Raman spectra of ascorbate reduced  $\text{N}_2\text{OR}$  containing 2-hole  $\text{Cu}_Z$  and 1-hole  $\text{Cu}_Z^*$  at pD 6.0 (red), pD 7.6 (green), and pD 10 (blue), with energies of the vibrations of the 2-hole  $\text{Cu}_Z$  site labeled.

| <b>Bond Lengths (Å)</b>                           | <b>PsN<sub>2</sub>OR</b> | <b>1-hole SH</b> | <b>1-hole OH</b> |
|---------------------------------------------------|--------------------------|------------------|------------------|
| Cu <sub>I</sub> -S <sub>1</sub>                   | 2.443                    | 2.437            | 2.431            |
| Cu <sub>II</sub> -S <sub>1</sub>                  | 2.187                    | 2.264            | 2.258            |
| Cu <sub>III</sub> -S <sub>1</sub>                 | 2.223                    | 2.229            | 2.240            |
| Cu <sub>IV</sub> -S <sub>1</sub>                  | 2.347                    | 2.255            | 2.260            |
| Cu <sub>I</sub> -S <sub>2</sub>                   | 2.608                    | 2.351            | ----             |
| Cu <sub>IV</sub> -S <sub>2</sub>                  | 2.493                    | 2.478            | ----             |
| Cu <sub>I</sub> -OH                               | ----                     | ----             | 1.978            |
| Cu <sub>IV</sub> -OH                              | ----                     | ----             | 2.075            |
| Cu <sub>I</sub> -S <sub>1</sub> -Cu <sub>IV</sub> | 89.5°                    | 91.0°            | 80.6°            |
| Cu <sub>I</sub> -S <sub>2</sub> -Cu <sub>IV</sub> | 82.8°                    | 87.8°            | ----             |
| S <sub>1</sub> -S <sub>2</sub>                    | 3.538                    | 3.379            | ----             |
| Cu <sub>I</sub> -Cu <sub>IV</sub>                 | 3.374                    | 3.350            | 3.037            |
| Cu <sub>I</sub> -Cu <sub>III</sub>                | 3.435                    | 3.320            | 3.670            |
| Cu <sub>II</sub> -Cu <sub>IV</sub>                | 2.822                    | 2.694            | 2.732            |
| Cu <sub>II</sub> -Cu <sub>III</sub>               | 2.763                    | 3.162            | 2.814            |
| Cu <sub>III</sub> -Cu <sub>IV</sub>               | 2.951                    | 3.343            | 3.037            |

Table S2: Comparison of the important bond lengths and angles for the Cu<sub>Z</sub> site obtained from X-ray crystallography of PsN<sub>2</sub>OR (PDB ID 3SBP, resolution 1.7 Å) and the optimized structure of the 1-hole Cu<sub>Z</sub> site with an SH<sup>-</sup> edge ligand (B3LYP, TZVP on Cu, S, and ligating N atoms, and SV on all remaining atoms, PCM of 4.0). For comparison, the optimized structure of the OH bridged model of resting Cu<sub>Z</sub>\* is also included.

| <b>Bond Lengths (Å)</b>            | <b>1-hole SH</b> |             | <b>1-hole S<sup>2-</sup></b> |             | <b>2-hole SH<sup>-</sup></b> |             | <b>2-hole S<sup>2-</sup></b> |             |
|------------------------------------|------------------|-------------|------------------------------|-------------|------------------------------|-------------|------------------------------|-------------|
|                                    |                  | <b>2Asp</b> |                              | <b>2Asp</b> |                              | <b>2Asp</b> |                              | <b>2Asp</b> |
| Cu <sub>I</sub> -S <sub>1</sub>    | 2.437            | 2.464       | 2.641                        | 2.565       | 2.385                        | 2.422       | 2.383                        | 2.406       |
| Cu <sub>II</sub> -S <sub>1</sub>   | 2.264            | 2.262       | 2.256                        | 2.258       | 2.270                        | 2.269       | 2.288                        | 2.285       |
| Cu <sub>III</sub> -S <sub>1</sub>  | 2.229            | 2.226       | 2.240                        | 2.229       | 2.232                        | 2.229       | 2.229                        | 2.225       |
| Cu <sub>IV</sub> -S <sub>1</sub>   | 2.255            | 2.244       | 2.263                        | 2.267       | 2.217                        | 2.215       | 2.202                        | 2.194       |
| Cu <sub>I</sub> -S <sub>2</sub>    | 2.351            | 2.350       | 2.194                        | 2.216       | 2.340                        | 2.338       | 2.229                        | 2.215       |
| Cu <sub>IV</sub> -S <sub>2</sub>   | 2.478            | 2.508       | 2.305                        | 2.319       | 2.448                        | 2.470       | 2.278                        | 2.293       |
| S <sub>1</sub> -S <sub>2</sub>     | 3.379            | 3.402       | 3.461                        | 3.443       | 3.164                        | 3.206       | 3.010                        | 3.074       |
| Cu <sub>I</sub> -N <sub>24</sub>   | 2.098            | 2.057       | 2.015                        | 2.021       | 2.030                        | 1.997       | 2.066                        | 2.018       |
| Cu <sub>I</sub> -N <sub>30</sub>   | 2.198            | 2.270       | 3.403                        | 3.028       | 2.100                        | 2.149       | 2.215                        | 2.394       |
| Cu <sub>II</sub> -N <sub>18</sub>  | 2.116            | 2.085       | 2.193                        | 2.156       | 2.043                        | 2.022       | 2.095                        | 2.071       |
| Cu <sub>II</sub> -N <sub>4</sub>   | 2.060            | 2.051       | 2.069                        | 2.055       | 2.045                        | 2.033       | 2.058                        | 2.046       |
| Cu <sub>III</sub> -N <sub>12</sub> | 2.026            | 2.028       | 2.050                        | 2.048       | 1.998                        | 2.003       | 2.009                        | 2.013       |
| Cu <sub>III</sub> -N <sub>36</sub> | 2.076            | 2.088       | 2.089                        | 2.111       | 2.051                        | 2.061       | 2.066                        | 2.073       |
| Cu <sub>IV</sub> -N <sub>50</sub>  | 2.037            | 2.034       | 2.074                        | 2.086       | 1.993                        | 1.995       | 2.001                        | 2.006       |

Table S3: Comparisons of key bond lengths for small computational models (white columns) of 1-hole and 2-hole Cu<sub>Z</sub> and large computational models (grey columns) including two second sphere Asp residues (optimized with B3LYP; tzvp Cu<sub>4</sub>S<sub>2</sub>N<sub>7</sub>/sv; PCM=4.0).



| Bond Lengths (Å)                   | 1-hole SH 2Asp                  |       | 1-hole S <sup>2-</sup> 2Asp |       | 2-hole SH- 2Asp |       | 2-hole S <sup>2-</sup> 2Asp |       |
|------------------------------------|---------------------------------|-------|-----------------------------|-------|-----------------|-------|-----------------------------|-------|
|                                    | Cu <sub>I</sub> -S <sub>1</sub> | 2.464 | 2.488                       | 2.565 | 2.580           | 2.422 | 2.438                       | 2.406 |
| Cu <sub>II</sub> -S <sub>1</sub>   | 2.262                           | 2.262 | 2.258                       | 2.257 | 2.269           | 2.275 | 2.285                       | 2.289 |
| Cu <sub>III</sub> -S <sub>1</sub>  | 2.226                           | 2.227 | 2.229                       | 2.231 | 2.229           | 2.229 | 2.225                       | 2.228 |
| Cu <sub>IV</sub> -S <sub>1</sub>   | 2.244                           | 2.245 | 2.267                       | 2.269 | 2.215           | 2.215 | 2.194                       | 2.190 |
| Cu <sub>I</sub> -S <sub>2</sub>    | 2.350                           | 2.346 | 2.216                       | 2.216 | 2.338           | 2.332 | 2.215                       | 2.204 |
| Cu <sub>IV</sub> -S <sub>2</sub>   | 2.508                           | 2.499 | 2.319                       | 2.313 | 2.470           | 2.468 | 2.293                       | 2.289 |
| S <sub>1</sub> -S <sub>2</sub>     | 3.402                           | 3.392 | 3.443                       | 3.433 | 3.206           | 3.187 | 3.074                       | 3.053 |
| Cu <sub>I</sub> -N <sub>24</sub>   | 2.057                           | 2.068 | 2.021                       | 2.031 | 1.997           | 2.007 | 2.018                       | 2.017 |
| Cu <sub>I</sub> -N <sub>30</sub>   | 2.270                           | 2.295 | 3.028                       | 3.032 | 2.149           | 2.171 | 2.394                       | 2.484 |
| Cu <sub>II</sub> -N <sub>18</sub>  | 2.085                           | 2.092 | 2.156                       | 2.167 | 2.022           | 2.027 | 2.071                       | 2.074 |
| Cu <sub>II</sub> -N <sub>4</sub>   | 2.051                           | 2.057 | 2.055                       | 2.059 | 2.033           | 2.039 | 2.046                       | 2.051 |
| Cu <sub>III</sub> -N <sub>12</sub> | 2.028                           | 2.039 | 2.048                       | 2.060 | 2.003           | 2.010 | 2.013                       | 2.024 |
| Cu <sub>III</sub> -N <sub>36</sub> | 2.088                           | 2.090 | 2.111                       | 2.114 | 2.061           | 2.064 | 2.073                       | 2.074 |
| Cu <sub>IV</sub> -N <sub>50</sub>  | 2.034                           | 2.042 | 2.086                       | 2.097 | 1.995           | 1.998 | 2.006                       | 2.006 |

Table S4: Basis set dependence of the calculated structures of 1-hole and 2-hole Cu<sub>z</sub> for large computational models (white: tzvp Cu<sub>4</sub>S<sub>2</sub>N<sub>7</sub>/sv; grey: tzvp Cu<sub>4</sub>S<sub>2</sub>His<sub>7</sub>/sv, B3LYP, PCM=4.0).

| Model                       | Mulliken Atomic Spin Density |                  |                   |                  |                                |                  |
|-----------------------------|------------------------------|------------------|-------------------|------------------|--------------------------------|------------------|
|                             | Cu <sub>I</sub>              | Cu <sub>II</sub> | Cu <sub>III</sub> | Cu <sub>IV</sub> | μ <sub>4</sub> S <sup>2-</sup> | μ <sub>2</sub> S |
| 1-hole SH- 2Asp             | 0.17                         | 0.11             | 0.05              | 0.10             | 0.34                           | 0.16             |
|                             | 0.14                         | 0.13             | 0.05              | 0.11             | 0.35                           | 0.16             |
| 1-hole S <sup>2-</sup> 2Asp | 0.15                         | 0.04             | 0.01              | 0.09             | 0.27                           | 0.40             |
|                             | 0.11                         | 0.04             | 0.02              | 0.16             | 0.29                           | 0.34             |

Table S5: Basis set dependence of the Mulliken atomic spin density distribution of 1-hole Cu<sub>z</sub> with 2 Asp residues (white: tzvp Cu<sub>4</sub>S<sub>2</sub>N<sub>7</sub>/sv; grey: tzvp Cu<sub>4</sub>S<sub>2</sub>His<sub>7</sub>/sv, B3LYP, PCM=4.0).

|                                 |        | Mulliken Atomic Spin Density |                  |                   |                  |                                |                  |
|---------------------------------|--------|------------------------------|------------------|-------------------|------------------|--------------------------------|------------------|
|                                 |        | Cu <sub>I</sub>              | Cu <sub>II</sub> | Cu <sub>III</sub> | Cu <sub>IV</sub> | μ <sub>4</sub> S <sup>2-</sup> | μ <sub>2</sub> S |
| 2-hole SH-<br>S=0               | α LUMO | 0.37                         | 0.06             | 0.06              | 0.04             | 0.20                           | 0.16             |
|                                 | β LUMO | 0.03                         | 0.17             | 0.09              | 0.16             | 0.30                           | 0.17             |
|                                 | α LUMO | 0.36                         | 0.06             | 0.06              | 0.04             | 0.21                           | 0.16             |
|                                 | β LUMO | 0.03                         | 0.21             | 0.07              | 0.15             | 0.29                           | 0.14             |
| 2-hole S <sup>2-</sup> -<br>S=0 | α LUMO | 0.22                         | 0.06             | 0.04              | 0.07             | 0.23                           | 0.33             |
|                                 | β LUMO | 0.05                         | 0.06             | 0.05              | 0.14             | 0.27                           | 0.37             |
|                                 | α LUMO | 0.18                         | 0.07             | 0.04              | 0.08             | 0.25                           | 0.34             |
|                                 | β LUMO | 0.07                         | 0.08             | 0.05              | 0.14             | 0.28                           | 0.33             |

Table S6: Basis set dependence of the Mulliken atomic spin density in the α and β LUMOs of 2-hole Cu<sub>4</sub>S<sub>2</sub> and 2-hole Cu<sub>4</sub>S(SH) (white: tzvp Cu<sub>4</sub>S<sub>2</sub>N<sub>7</sub>/sv, grey: tzvp Cu<sub>4</sub>S<sub>2</sub>His<sub>7</sub>/sv, B3LYP and PCM=4.0).

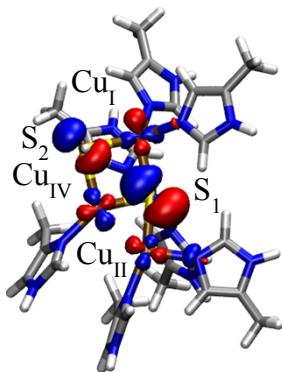

Figure S7: Ground state wavefunction of the 1-hole SH model of  $\text{Cu}_Z$ .

|                  | $g_x$ | $g_y$ | $g_z$ |
|------------------|-------|-------|-------|
| <b>SH bridge</b> | 2.044 | 2.057 | 2.158 |
| <b>OH bridge</b> | 2.055 | 2.076 | 2.243 |

Table S7: Computationally predicted  $g$  values for  $\text{SH}^-$  bridged model of 1-hole  $\text{Cu}_Z$  (B3LYP, tzvp on  $\text{Cu}_4\text{S}_2\text{N}_7$ , sv on remainder, PCM=4.0) and  $\text{OH}^-$  bridged model of 1-hole  $\text{Cu}_Z^*$  with second sphere Lys and Glu (B3LYP, tzvp on  $\text{Cu}_4\text{SN}_7\text{O}$ , sv on remainder, PCM=4.0), calculated using Orca.<sup>13</sup>

| <b>1-hole <math>\text{SH}^-</math> bridge</b>                     |                                                          | <b>1-hole <math>\text{OH}^-</math> bridge</b>                     |                                                          |
|-------------------------------------------------------------------|----------------------------------------------------------|-------------------------------------------------------------------|----------------------------------------------------------|
| <i>Energy (<math>\text{cm}^{-1}</math>)</i><br><i>(H/D shift)</i> | <i>Vibration</i>                                         | <i>Energy (<math>\text{cm}^{-1}</math>)</i><br><i>(H/D shift)</i> | <i>Vibration</i>                                         |
| 461 (-125)                                                        | S-H bend $\parallel$ to $\text{Cu}_I\text{-Cu}_{IV}$     | 682 (-175)                                                        | O-H bend $\parallel$ to $\text{Cu}_I\text{-Cu}_{IV}$     |
| 426 (-123)                                                        | S-H bend $\perp$ to $\text{Cu}_I\text{-Cu}_{IV}$         | 510 (-128)                                                        | O-H bend $\perp$ to $\text{Cu}_I\text{-Cu}_{IV}$         |
|                                                                   |                                                          | 396 (-8)                                                          | $\text{Cu}_I\text{-OH}$                                  |
| 320 (+1)                                                          | $\text{Cu}_{II}\text{-}\mu_4\text{S}\text{-Cu}_{IV}$ sym | 341 (-1)                                                          | $\text{Cu}_{II}\text{-S}\text{-Cu}_{III}\text{-Cu}_{IV}$ |
| 310 (+6)                                                          | $\text{Cu}_{III}\text{-}\mu_4\text{S}$                   | 312 (-3)                                                          | $\text{Cu}_{III}\text{-S}\text{-Cu}_{IV}$ sym            |
| 299 (-2)                                                          | $\text{Cu}_I\text{-}\mu_4\text{S}\text{-Cu}_{IV}$ sym    | 285 (0)                                                           | $\text{Cu}_{III}\text{-S}\text{-Cu}_{IV}$ antisym        |
|                                                                   |                                                          | 268 (-3)                                                          | $\text{Cu}_{IV}\text{-OH}$                               |
| 242 (-2)                                                          | $\text{Cu}_I\text{-}\mu_2\text{S}$                       |                                                                   |                                                          |
| 178 (0)                                                           | $\text{Cu}_{IV}\text{-}\mu_2\text{S}$                    |                                                                   |                                                          |
| 162 (0)                                                           | $\text{Cu}_I\text{-}\mu_4\text{S}$                       | 209 (0)                                                           | $\text{Cu}_I\text{-S}$                                   |

Table S8: Vibrations predicted for the 1-hole  $\text{SH}^-$  bridged model of  $\text{Cu}_Z$  and the 1-hole  $\text{OH}^-$  bridged model of  $\text{Cu}_Z^*$ . Stretching vibrations of the  $\mu_2$  edge ligand are highlighted in grey.

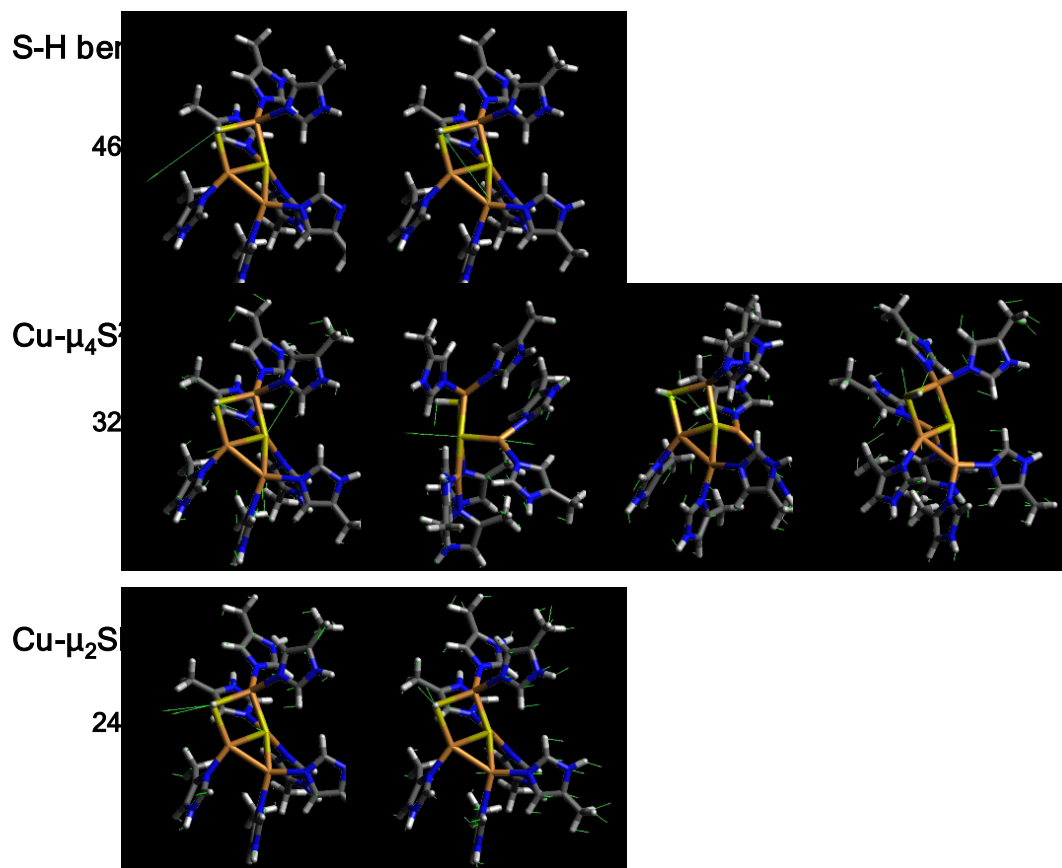

Figure S8: Pictorial representations of the vibrations of the 1-hole SH<sup>-</sup> model listed in Table S4.

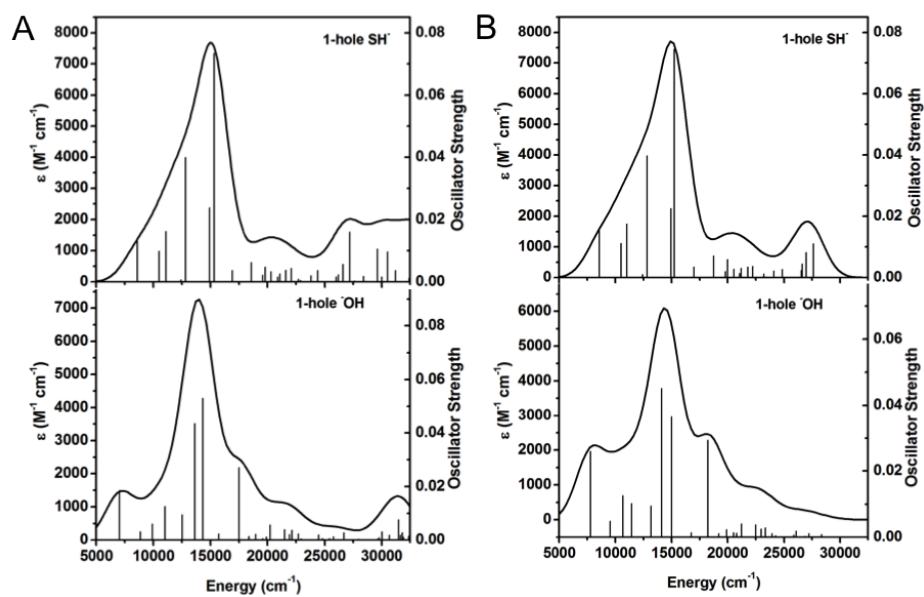

Figure S9: TD DFT predicted absorption spectra of the 1-hole SH<sup>-</sup> bridged model of Cu<sub>Z</sub> (top) and the OH bridged model of Cu<sub>Z</sub><sup>\*</sup> (bottom) with two functionals: A) B3LYP, and B) B98.

| Bond Lengths (Å)                                  | 1-hole SH | 2-hole SH <sup>-</sup> | 2-hole S <sup>2-</sup> |
|---------------------------------------------------|-----------|------------------------|------------------------|
| Cu <sub>I</sub> -S <sub>1</sub>                   | 2.437     | 2.385                  | 2.383                  |
| Cu <sub>II</sub> -S <sub>1</sub>                  | 2.264     | 2.270                  | 2.288                  |
| Cu <sub>III</sub> -S <sub>1</sub>                 | 2.229     | 2.232                  | 2.229                  |
| Cu <sub>IV</sub> -S <sub>1</sub>                  | 2.255     | 2.217                  | 2.202                  |
| Cu <sub>I</sub> -S <sub>2</sub>                   | 2.351     | 2.340                  | 2.229                  |
| Cu <sub>IV</sub> -S <sub>2</sub>                  | 2.478     | 2.448                  | 2.278                  |
| Cu <sub>I</sub> -S <sub>1</sub> -Cu <sub>IV</sub> | 91.0°     | 97.5                   | 95.8°                  |
| Cu <sub>I</sub> -S <sub>2</sub> -Cu <sub>IV</sub> | 87.8°     | 92.6                   | 98.0°                  |
| S <sub>1</sub> -S <sub>2</sub>                    | 3.379     | 3.164                  | 3.010                  |
| Cu <sub>I</sub> -Cu <sub>IV</sub>                 | 3.350     | 3.463                  | 3.403                  |
| Cu <sub>I</sub> -Cu <sub>III</sub>                | 3.320     | 3.177                  | 3.341                  |
| Cu <sub>II</sub> -Cu <sub>IV</sub>                | 2.694     | 2.660                  | 2.682                  |
| Cu <sub>II</sub> -Cu <sub>III</sub>               | 3.162     | 3.208                  | 3.164                  |
| Cu <sub>III</sub> -Cu <sub>IV</sub>               | 3.343     | 3.317                  | 3.383                  |

Table S9: Comparison of important bond lengths and angles of the broken symmetry singlet 2-hole 4CuS(SH) and 4Cu2S models with the computational model of 1-hole Cu<sub>z</sub> (B3LYP, TZVP on Cu, S, and ligating N atoms, and SV on all remaining atoms, PCM of 4.0).

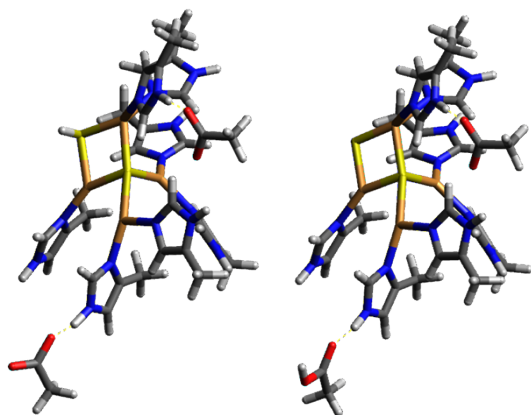

Figure S10: Structural models of 2-hole SH<sup>-</sup> with second sphere Asp residues and 2-hole S<sup>2-</sup> model after internal proton transfer.

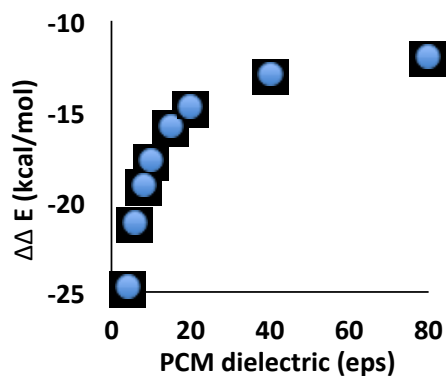

Figure S11: Dependence of the  $\Delta\Delta E$  for deprotonation of the 2-hole  $4\text{CuS}(\text{SH})$  model (+1 charge) relative to the 1-hole  $4\text{CuS}(\text{SH})$  model (neutral) on the dielectric used for the PCM.

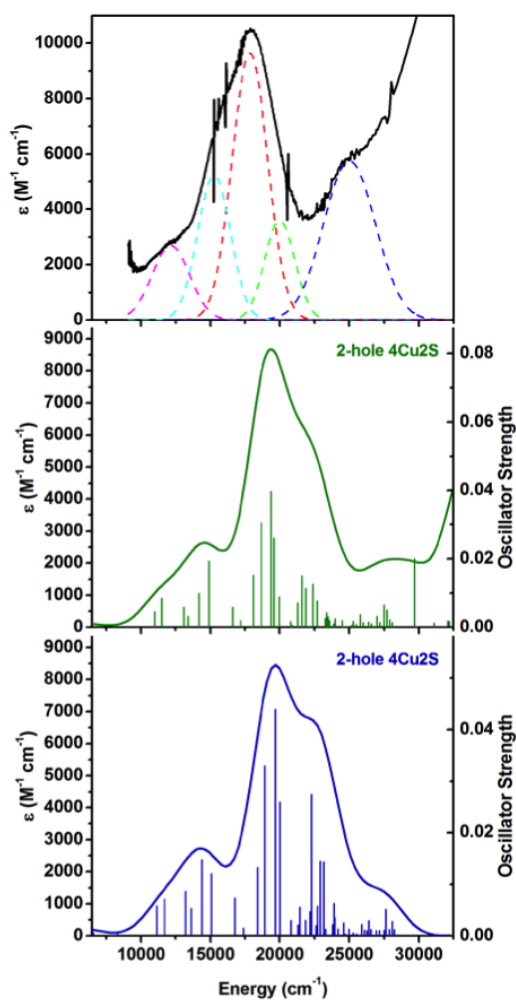

Figure S12: Comparison of the experimental absorption spectrum of 2-hole  $\text{Cu}_2$  (black) and the TD DFT predicted absorption spectrum of the broken symmetry singlet 2-hole  $4\text{Cu}_2\text{S}$  model (green, B3LYP; blue, B98; TZVP on  $\text{Cu}_4\text{S}_2\text{N}_7$ , SV on remainder, PCM of 4.0).

| 2-hole S <sup>2-</sup> (S=0) |                                                                                                 | 1-hole SH <sup>-</sup> (S=1/2) |                                                         |
|------------------------------|-------------------------------------------------------------------------------------------------|--------------------------------|---------------------------------------------------------|
| Energy (cm <sup>-1</sup> )   | Vibration                                                                                       | Energy (cm <sup>-1</sup> )     | Vibration                                               |
|                              |                                                                                                 | 461                            | S-H bend // to Cu <sub>I</sub> -Cu <sub>IV</sub>        |
|                              |                                                                                                 | 426                            | S-H bend ⊥ to Cu <sub>I</sub> -Cu <sub>IV</sub>         |
| 344                          | Cu <sub>II</sub> -μ <sub>4</sub> S-Cu <sub>IV</sub> sym                                         | 320                            | Cu <sub>II</sub> -μ <sub>4</sub> S-Cu <sub>IV</sub> sym |
| 312                          | μ <sub>2</sub> S-Cu <sub>I</sub> -μ <sub>4</sub> S sym, Cu <sub>III</sub> -μ <sub>2</sub> S     | 310                            | Cu <sub>III</sub> -μ <sub>4</sub> S                     |
| 309                          | μ <sub>2</sub> S-Cu <sub>I</sub> -μ <sub>4</sub> S antisym, Cu <sub>III</sub> -μ <sub>2</sub> S |                                |                                                         |
| 297                          | Cu <sub>II</sub> -μ <sub>4</sub> S                                                              | 299                            | Cu <sub>I</sub> -μ <sub>4</sub> S-Cu <sub>IV</sub> sym  |
|                              |                                                                                                 | 242                            | Cu <sub>I</sub> -μ <sub>2</sub> S                       |
| 256                          | Cu <sub>IV</sub> -μ <sub>2</sub> S                                                              | 178                            | Cu <sub>IV</sub> -μ <sub>2</sub> S                      |
| 202                          | Cu <sub>I</sub> -μ <sub>4</sub> S                                                               | 162 (0)                        | Cu <sub>I</sub> -μ <sub>4</sub> S                       |

Table S10: Predicted vibrations of the 2-hole 4Cu<sub>2</sub>S model of 2-hole Cu<sub>Z</sub> and the 1-hole SH<sup>-</sup> model of 1-hole Cu<sub>Z</sub>, vibrations with edge ligand character highlighted in grey.

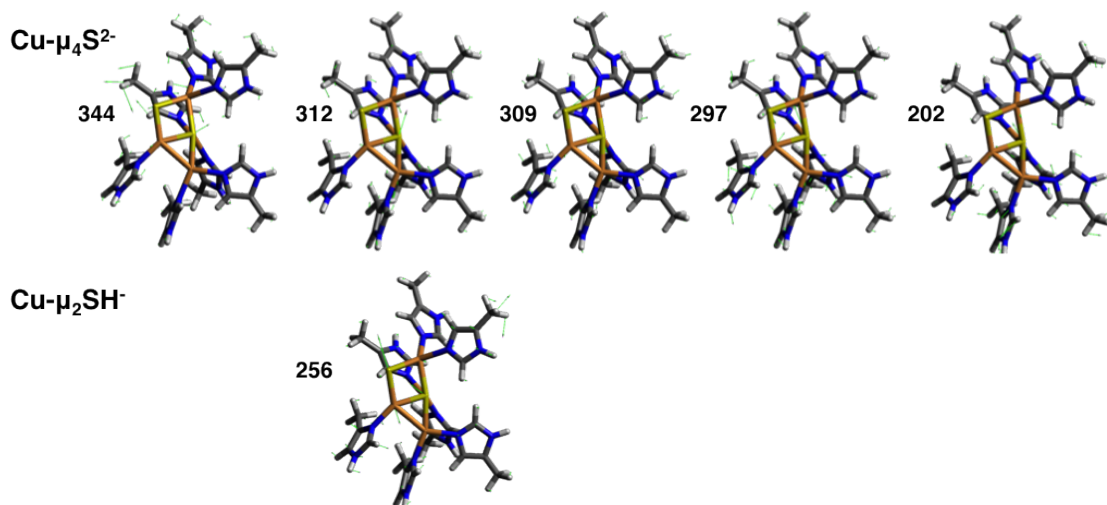

Figure S13: Pictorial representations of the vibrations of the 2-hole μ<sub>2</sub>S<sup>2-</sup> model listed in Table S6.

**Calculated Structures**1-hole SH- small model (B3LYP; tzvp Cu<sub>4</sub>S<sub>2</sub>N<sub>7</sub>/sv; PCM=4.0)

2 2

|    |          |          |          |
|----|----------|----------|----------|
| Cu | 15.86139 | 27.55597 | 1.79755  |
| Cu | 12.74928 | 26.73854 | 0.98044  |
| Cu | 13.70871 | 25.35849 | -1.6976  |
| Cu | 15.23553 | 24.5845  | 0.38261  |
| S  | 16.63083 | 25.38456 | 2.26727  |
| S  | 14.67052 | 26.70118 | -0.14984 |
| N  | 10.8479  | 26.8082  | 0.28351  |
| N  | 9.04306  | 26.5699  | -0.97603 |
| N  | 12.66796 | 22.11305 | -4.17502 |
| N  | 12.93728 | 23.70057 | -2.64538 |
| N  | 14.65004 | 20.62702 | -0.93098 |
| N  | 14.93705 | 22.59769 | 0.04673  |
| N  | 12.44895 | 26.55091 | 3.02619  |
| N  | 12.20806 | 27.04802 | 5.17805  |
| N  | 14.94305 | 28.69998 | 3.4348   |
| N  | 13.757   | 30.195   | 4.58299  |
| N  | 16.54144 | 29.32417 | 0.89527  |
| N  | 16.71898 | 31.01201 | -0.53001 |
| N  | 13.24926 | 26.94095 | -3.02532 |
| N  | 12.54999 | 28.77303 | -4.08699 |
| C  | 10.34988 | 26.98969 | -0.93461 |
| C  | 9.82961  | 26.26193 | 1.05574  |
| C  | 8.69711  | 26.10499 | 0.28674  |
| C  | 7.36497  | 25.56102 | 0.61601  |
| C  | 13.47622 | 23.11861 | -3.71994 |
| C  | 11.56026 | 22.04478 | -3.34597 |
| C  | 11.72884 | 23.03508 | -2.39655 |
| C  | 10.79505 | 23.40098 | -1.29493 |
| C  | 15.32373 | 21.81892 | -0.96343 |
| C  | 13.79875 | 20.64682 | 0.16634  |
| C  | 13.98108 | 21.87646 | 0.76882  |
| C  | 13.32991 | 22.439   | 1.98394  |
| C  | 11.82032 | 27.34213 | 3.89135  |
| C  | 13.26121 | 25.71403 | 3.78026  |
| C  | 13.12532 | 26.00638 | 5.11981  |
| C  | 13.79395 | 25.449   | 6.31296  |
| C  | 13.96169 | 29.59036 | 3.36096  |
| C  | 15.40285 | 28.7359  | 4.74617  |
| C  | 14.68279 | 29.66452 | 5.4767   |
| C  | 14.78501 | 30.121   | 6.88399  |
| C  | 16.40314 | 29.6851  | -0.37487 |
| C  | 16.97783 | 30.45348 | 1.58238  |
| C  | 17.0973  | 31.51697 | 0.70766  |
| C  | 17.51601 | 32.92799 | 0.886    |
| C  | 13.30511 | 28.27144 | -3.0407  |
| C  | 12.44548 | 26.56758 | -4.08474 |

|   |          |          |          |
|---|----------|----------|----------|
| C | 11.99951 | 27.68529 | -4.74351 |
| C | 11.08802 | 27.77498 | -5.87499 |
| H | 10.88161 | 27.39413 | -1.78978 |
| H | 9.97489  | 26.00718 | 2.10065  |
| H | 8.42887  | 26.61196 | -1.78401 |
| H | 7.12842  | 24.65164 | 0.02913  |
| H | 6.55523  | 26.29201 | 0.42317  |
| H | 7.31589  | 25.28673 | 1.68287  |
| H | 12.85194 | 21.52202 | -4.98047 |
| H | 14.41766 | 23.38857 | -4.18987 |
| H | 10.76188 | 21.32278 | -3.48977 |
| H | 10.24597 | 24.33375 | -1.51614 |
| H | 10.04939 | 22.60305 | -1.137   |
| H | 11.33412 | 23.55946 | -0.34386 |
| H | 14.78235 | 19.85165 | -1.57312 |
| H | 16.06243 | 22.06972 | -1.71892 |
| H | 13.15676 | 19.8108  | 0.4273   |
| H | 12.81391 | 23.39317 | 1.76507  |
| H | 14.07055 | 22.63672 | 2.7816   |
| H | 12.5812  | 21.73684 | 2.38929  |
| H | 11.10021 | 28.11761 | 3.64694  |
| H | 13.90857 | 24.97271 | 3.32554  |
| H | 11.86807 | 27.49935 | 6.02185  |
| H | 14.41799 | 24.58341 | 6.0351   |
| H | 14.45847 | 26.19372 | 6.79481  |
| H | 13.06967 | 25.10933 | 7.07839  |
| H | 13.38485 | 29.82945 | 2.47221  |
| H | 16.21586 | 28.09948 | 5.08543  |
| H | 13.08263 | 30.92682 | 4.78462  |
| H | 15.07255 | 31.18895 | 6.95236  |
| H | 13.83008 | 30.00597 | 7.43293  |
| H | 15.55129 | 29.53901 | 7.42317  |
| H | 16.08648 | 29.03521 | -1.18492 |
| H | 17.17388 | 30.43528 | 2.65007  |
| H | 16.71566 | 31.52797 | -1.40477 |
| H | 18.40918 | 33.17443 | 0.27902  |
| H | 16.71651 | 33.63885 | 0.59867  |
| H | 17.77111 | 33.12412 | 1.94102  |
| H | 13.84112 | 28.89416 | -2.33062 |
| H | 12.22151 | 25.5313  | -4.31285 |
| H | 12.42667 | 29.75271 | -4.32515 |
| H | 10.78863 | 26.76741 | -6.20869 |
| H | 10.16036 | 28.33038 | -5.62946 |
| H | 11.53842 | 28.28677 | -6.74902 |
| H | 17.75519 | 25.40603 | 1.51642  |

1-hole OH<sup>-</sup> small model (B3LYP; tzvp Cu<sub>4</sub>S<sub>2</sub>N<sub>7</sub>/sv; PCM=4.0)

2 2

C 21.7600010000 43.4680050000 13.8479930000

C 22.4559810000 42.8500230000 15.0341560000

N 22.2048690000 41.5400730000 15.4668000000



C 23.3939490000 43.4104860000 15.8871700000  
C 22.9611830000 41.3273530000 16.5441940000  
N 23.7059930000 42.4349990000 16.8339960000  
H 21.6526130000 42.7383410000 13.0311300000  
H 20.7468740000 43.8189100000 14.1137020000  
H 23.8527010000 44.3950900000 15.8944730000  
H 22.9972460000 40.4113790000 17.1265760000  
H 24.3522700000 42.5388250000 17.6106340000  
C 18.5340020000 45.9070030000 11.4620000000  
C 18.5089860000 44.5723460000 12.1217350000  
N 18.0959990000 44.3620020000 13.4380020000  
C 18.8667520000 43.3216870000 11.6569870000  
C 18.2180670000 43.0241370000 13.7199370000  
N 18.6857510000 42.3725370000 12.6593190000  
H 17.5320890000 46.3780880000 11.4399890000  
H 18.8799770000 45.8079680000 10.4198690000  
H 19.2459580000 43.0505430000 10.6764420000  
H 17.9757520000 42.5878140000 14.6847510000  
H 17.7561890000 45.0755710000 14.0764140000  
C 17.4769980000 42.6500030000 18.5280000000  
C 18.0630370000 41.6145090000 17.6525410000  
N 17.3850030000 40.4789930000 17.2110080000  
C 19.3181590000 41.5290890000 17.0887700000  
C 18.2371410000 39.7638490000 16.4122910000  
N 19.4089400000 40.3800810000 16.3193460000  
H 16.5770110000 43.1180070000 18.0821070000  
H 17.1733210000 42.2441770000 19.5133610000  
H 20.1471950000 42.2234400000 17.1889390000  
H 17.9621210000 38.8434270000 15.9097110000  
H 16.4330120000 40.2210810000 17.4543510000  
C 14.7850100000 33.8560010000 13.5820050000  
C 16.0263110000 34.6953190000 13.5586720000  
N 16.4239850000 35.4900000000 14.6369940000  
C 17.0095700000 34.8927470000 12.6031460000  
C 17.6030150000 36.1015570000 14.3184900000  
N 17.9778100000 35.7735730000 13.0882980000  
H 14.8252270000 33.0881520000 14.3788540000  
H 14.6630610000 33.3326770000 12.6190670000  
H 17.0765320000 34.4627370000 11.6082710000  
H 18.1426740000 36.7647820000 14.9855960000  
H 15.9390800000 35.5601940000 15.5268420000  
C 16.3110060000 36.1230050000 7.1490040000  
C 16.7896110000 36.5968780000 8.4763030000  
N 16.0009990000 37.3419970000 9.3540050000  
C 17.9973480000 36.4327780000 9.1339590000  
C 16.7450950000 37.5817260000 10.4874900000  
N 17.9545200000 37.0492700000 10.3771630000  
H 16.0067580000 36.9599630000 6.4899950000  
H 17.1102730000 35.5651460000 6.6329870000  
H 18.8852790000 35.9116750000 8.7846580000  
H 16.3648540000 38.1300010000 11.3448350000

H 15.0377050000 37.6240220000 9.1978130000  
 C 20.5880130000 38.8279890000 7.1139770000  
 C 19.9508840000 39.3873800000 8.3430080000  
 N 18.6039740000 39.7310010000 8.4179900000  
 C 20.4584410000 39.7087580000 9.5869020000  
 C 18.3522920000 40.2605390000 9.6512640000  
 N 19.4581520000 40.2557860000 10.3846940000  
 H 20.5461620000 39.5401190000 6.2666650000  
 H 21.6486650000 38.5979010000 7.3087310000  
 H 21.4670370000 39.5528770000 9.9503600000  
 H 17.3769570000 40.6254060000 9.9591840000  
 H 17.9279940000 39.6317610000 7.6670290000  
 C 23.2859940000 41.3879980000 11.0910050000  
 C 23.9278860000 40.8259470000 12.3379070000  
 N 23.5407210000 39.6053000000 12.9152740000  
 C 24.9465260000 41.3591170000 13.1105800000  
 C 24.3072490000 39.4177130000 13.9900230000  
 N 25.1660320000 40.4670240000 14.1610390000  
 H 23.6854070000 42.3935330000 10.8757540000  
 H 22.1901820000 41.4681760000 11.2042750000  
 H 25.5165760000 42.2767310000 12.9990350000  
 H 24.2608570000 38.5668120000 14.6642590000  
 H 25.8736980000 40.5532010000 14.8836300000  
 Cu 19.4323900000 36.8271170000 12.0371950000  
 Cu 20.8419820000 40.1815390000 14.8129040000  
 Cu 19.3419920000 40.4724330000 12.4496800000  
 Cu 21.7551700000 38.6523660000 12.7409130000  
 S 19.6906700000 38.6195970000 13.6587630000  
 O 21.3177420000 37.0593780000 11.4848300000  
 H 13.8774300000 34.4666030000 13.7528010000  
 H 18.2119590000 43.4504540000 18.7148950000  
 H 15.4385470000 35.4463710000 7.2404260000  
 H 20.0964230000 37.8911600000 6.7873600000  
 H 19.2170370000 46.6104350000 11.9770200000  
 H 22.3310730000 44.3352340000 13.4743740000  
 H 23.4881100000 40.7475890000 10.2124460000  
 H 21.8434620000 36.3065520000 11.7773800000

2-hole SH<sup>-</sup> small model, S=0 (B3LYP; tzvp Cu<sub>4</sub>S<sub>2</sub>N<sub>7</sub>/sv; PCM=4.0)

3 1

|    |          |          |          |
|----|----------|----------|----------|
| Cu | 15.65823 | 27.6691  | 1.76304  |
| Cu | 12.71994 | 26.73202 | 1.00224  |
| Cu | 13.67199 | 25.38976 | -1.7519  |
| Cu | 15.13829 | 24.56938 | 0.31009  |
| S  | 16.42529 | 25.49663 | 2.17437  |
| S  | 14.63163 | 26.67881 | -0.14801 |
| N  | 10.86237 | 26.74981 | 0.26729  |
| N  | 9.04303  | 26.56999 | -0.97598 |
| N  | 12.66798 | 22.1131  | -4.1748  |
| N  | 12.92966 | 23.71812 | -2.66591 |

|   |          |          |          |
|---|----------|----------|----------|
| N | 14.64999 | 20.62699 | -0.931   |
| N | 14.88984 | 22.61465 | 0.00911  |
| N | 12.45192 | 26.55184 | 3.02778  |
| N | 12.20805 | 27.048   | 5.178    |
| N | 14.91333 | 28.68303 | 3.44487  |
| N | 13.75701 | 30.19498 | 4.58298  |
| N | 16.26094 | 29.4106  | 0.91155  |
| N | 16.71891 | 31.01203 | -0.53007 |
| N | 13.18331 | 26.95353 | -2.973   |
| N | 12.55002 | 28.77302 | -4.08693 |
| C | 10.35241 | 26.97255 | -0.94179 |
| C | 9.84675  | 26.19506 | 1.03856  |
| C | 8.70442  | 26.0773  | 0.27821  |
| C | 7.36497  | 25.561   | 0.616    |
| C | 13.46777 | 23.13181 | -3.74207 |
| C | 11.56972 | 22.0385  | -3.33535 |
| C | 11.73015 | 23.03996 | -2.39734 |
| C | 10.79497 | 23.4009  | -1.29518 |
| C | 15.28617 | 21.83291 | -0.99861 |
| C | 13.81914 | 20.63496 | 0.18141  |
| C | 13.97005 | 21.87766 | 0.763    |
| C | 13.33002 | 22.43901 | 1.984    |
| C | 11.82306 | 27.34716 | 3.89329  |
| C | 13.2546  | 25.70624 | 3.78464  |
| C | 13.11952 | 26.0025  | 5.12274  |
| C | 13.79396 | 25.44901 | 6.31297  |
| C | 13.94218 | 29.59062 | 3.3666   |
| C | 15.38147 | 28.71118 | 4.75373  |
| C | 14.67593 | 29.65485 | 5.47957  |
| C | 14.78501 | 30.12099 | 6.88399  |
| C | 16.28589 | 29.72726 | -0.37961 |
| C | 16.70913 | 30.53016 | 1.61332  |
| C | 17.00374 | 31.54335 | 0.72083  |
| C | 17.51601 | 32.92798 | 0.886    |
| C | 13.28317 | 28.28487 | -3.02466 |
| C | 12.37101 | 26.57334 | -4.02729 |
| C | 11.96963 | 27.6871  | -4.71963 |
| C | 11.08807 | 27.77501 | -5.87496 |
| H | 10.87409 | 27.40063 | -1.79015 |
| H | 9.99723  | 25.91193 | 2.07512  |
| H | 8.41702  | 26.6477  | -1.77291 |
| H | 7.08371  | 24.69058 | -0.00801 |
| H | 6.57709  | 26.32741 | 0.47908  |
| H | 7.33239  | 25.23752 | 1.6693   |
| H | 12.85021 | 21.51652 | -4.97735 |
| H | 14.3999  | 23.40961 | -4.22592 |
| H | 10.77958 | 21.30489 | -3.46479 |
| H | 10.24189 | 24.3311  | -1.5157  |
| H | 10.0522  | 22.60013 | -1.14234 |
| H | 11.32988 | 23.55388 | -0.34016 |
| H | 14.79657 | 19.84305 | -1.56071 |

|   |          |          |          |
|---|----------|----------|----------|
| H | 16.00453 | 22.09087 | -1.77067 |
| H | 13.21065 | 19.78219 | 0.46689  |
| H | 12.793   | 23.38338 | 1.76934  |
| H | 14.07684 | 22.6436  | 2.77402  |
| H | 12.59578 | 21.72944 | 2.4015   |
| H | 11.10413 | 28.12369 | 3.6494   |
| H | 13.88392 | 24.94567 | 3.33917  |
| H | 11.85958 | 27.49391 | 6.02222  |
| H | 14.40875 | 24.57601 | 6.0382   |
| H | 14.46563 | 26.19402 | 6.78366  |
| H | 13.0734  | 25.12166 | 7.08631  |
| H | 13.36838 | 29.83922 | 2.47931  |
| H | 16.18711 | 28.06534 | 5.09139  |
| H | 13.092   | 30.9355  | 4.78751  |
| H | 15.0989  | 31.18162 | 6.94018  |
| H | 13.82454 | 30.03576 | 7.42673  |
| H | 15.5341  | 29.52566 | 7.43179  |
| H | 16.02564 | 29.07325 | -1.20544 |
| H | 16.7967  | 30.53756 | 2.69452  |
| H | 16.84709 | 31.49349 | -1.41634 |
| H | 18.48593 | 33.06843 | 0.37169  |
| H | 16.8118  | 33.6779  | 0.47704  |
| H | 17.66894 | 33.1585  | 1.95304  |
| H | 13.83849 | 28.91408 | -2.33661 |
| H | 12.11695 | 25.53968 | -4.2302  |
| H | 12.46179 | 29.74958 | -4.35484 |
| H | 11.58618 | 28.22798 | -6.75503 |
| H | 10.74471 | 26.77154 | -6.17578 |
| H | 10.18697 | 28.38732 | -5.67346 |
| H | 17.52601 | 25.61015 | 1.39473  |

2-hole S<sup>2-</sup> small model, S=0 (B3LYP; tzvp Cu<sub>4</sub>S<sub>2</sub>N<sub>7</sub>/sv; PCM=4.0)

2 1

|    |          |          |          |
|----|----------|----------|----------|
| Cu | 15.23096 | 24.54935 | 0.33875  |
| Cu | 13.69156 | 25.36458 | -1.69996 |
| Cu | 12.72744 | 26.7311  | 0.9859   |
| Cu | 15.86465 | 27.57147 | 1.76888  |
| S  | 14.68315 | 26.64056 | -0.07963 |
| S  | 16.51355 | 25.4504  | 1.99241  |
| N  | 12.54991 | 28.77318 | -4.08708 |
| N  | 13.19784 | 26.95621 | -2.97113 |
| N  | 16.71899 | 31.01205 | -0.53007 |
| N  | 16.43966 | 29.3618  | 0.9126   |
| N  | 13.75697 | 30.19496 | 4.58298  |
| N  | 14.94252 | 28.69924 | 3.43732  |
| N  | 12.20789 | 27.04799 | 5.17804  |
| N  | 12.45695 | 26.56105 | 3.02715  |
| N  | 14.91995 | 22.59702 | 0.0319   |
| N  | 14.65012 | 20.62699 | -0.93089 |
| N  | 12.93552 | 23.70174 | -2.64707 |
| N  | 12.66792 | 22.11308 | -4.17514 |

|   |          |          |          |
|---|----------|----------|----------|
| N | 9.04337  | 26.56951 | -0.97597 |
| N | 10.84714 | 26.80972 | 0.28202  |
| C | 11.08806 | 27.77497 | -5.875   |
| C | 11.97491 | 27.68422 | -4.72005 |
| C | 12.38747 | 26.57393 | -4.02609 |
| C | 13.28722 | 28.28486 | -3.02417 |
| C | 17.51602 | 32.92796 | 0.88603  |
| C | 17.05995 | 31.5301  | 0.71226  |
| C | 16.87644 | 30.48831 | 1.60001  |
| C | 16.36265 | 29.69905 | -0.36809 |
| C | 14.78504 | 30.121   | 6.88397  |
| C | 14.68257 | 29.66443 | 5.47722  |
| C | 15.40228 | 28.73477 | 4.74763  |
| C | 13.96085 | 29.58894 | 3.36234  |
| C | 13.79403 | 25.449   | 6.31295  |
| C | 13.13251 | 26.01241 | 5.11786  |
| C | 13.27666 | 25.72799 | 3.77759  |
| C | 11.81775 | 27.34344 | 3.89363  |
| C | 13.32961 | 22.43902 | 1.9837   |
| C | 13.97423 | 21.87485 | 0.76551  |
| C | 13.80258 | 20.64127 | 0.16947  |
| C | 15.31348 | 21.81949 | -0.97485 |
| C | 10.79524 | 23.4011  | -1.29457 |
| C | 11.72825 | 23.03453 | -2.39658 |
| C | 11.56107 | 22.04323 | -3.34506 |
| C | 13.4748  | 23.1203  | -3.72212 |
| C | 7.36485  | 25.56119 | 0.61606  |
| C | 8.69775  | 26.10366 | 0.28668  |
| C | 9.83006  | 26.26128 | 1.05555  |
| C | 10.34807 | 26.99185 | -0.93595 |
| H | 11.58121 | 28.23556 | -6.75421 |
| H | 10.18324 | 28.38033 | -5.66729 |
| H | 10.74994 | 26.77085 | -6.18066 |
| H | 12.45435 | 29.74916 | -4.35258 |
| H | 12.14106 | 25.5374  | -4.22699 |
| H | 13.83722 | 28.91795 | -2.33419 |
| H | 17.70765 | 33.14153 | 1.95094  |
| H | 16.7643  | 33.65893 | 0.52895  |
| H | 18.45583 | 33.12808 | 0.33492  |
| H | 16.76636 | 31.51246 | -1.41272 |
| H | 17.03037 | 30.4828  | 2.67438  |
| H | 16.07333 | 29.04137 | -1.18197 |
| H | 15.55258 | 29.5401  | 7.42247  |
| H | 13.83073 | 30.00422 | 7.4337   |
| H | 15.07093 | 31.18939 | 6.95249  |
| H | 13.081   | 30.92512 | 4.78527  |
| H | 16.21413 | 28.09681 | 5.08683  |
| H | 13.38432 | 29.82837 | 2.47361  |
| H | 13.0651  | 25.07745 | 7.05924  |
| H | 14.4328  | 26.19931 | 6.82032  |
| H | 14.44271 | 24.60381 | 6.02913  |

|   |          |          |          |
|---|----------|----------|----------|
| H | 11.8598  | 27.49027 | 6.02333  |
| H | 13.96091 | 25.02466 | 3.31543  |
| H | 11.09018 | 28.11267 | 3.65152  |
| H | 12.59394 | 21.73068 | 2.40185  |
| H | 14.07736 | 22.65344 | 2.76973  |
| H | 12.80116 | 23.38644 | 1.76515  |
| H | 13.1721  | 19.79849 | 0.43624  |
| H | 16.04945 | 22.07264 | -1.73186 |
| H | 14.78856 | 19.84731 | -1.56672 |
| H | 11.3341  | 23.55731 | -0.34285 |
| H | 10.04849 | 22.6042  | -1.13714 |
| H | 10.24713 | 24.33448 | -1.51556 |
| H | 10.76411 | 21.31941 | -3.48745 |
| H | 14.41537 | 23.39153 | -4.19308 |
| H | 12.85262 | 21.52133 | -4.98    |
| H | 7.31662  | 25.28373 | 1.68207  |
| H | 6.55674  | 26.29475 | 0.42645  |
| H | 7.12596  | 24.65425 | 0.02654  |
| H | 8.42793  | 26.61311 | -1.78301 |
| H | 9.97651  | 26.00687 | 2.10035  |
| H | 10.87719 | 27.39855 | -1.79088 |

1-hole SH<sup>-</sup> model with 2Asp (B3LYP; tzvp Cu<sub>4</sub>S<sub>2</sub>N<sub>7</sub>/sv; PCM=4.0)

0 2

|    |          |          |          |
|----|----------|----------|----------|
| Cu | 15.9695  | 27.55711 | 1.76019  |
| Cu | 12.75043 | 26.7413  | 0.96994  |
| Cu | 13.6932  | 25.37288 | -1.70069 |
| Cu | 15.22099 | 24.58413 | 0.37046  |
| S  | 16.61098 | 25.36324 | 2.30761  |
| S  | 14.67326 | 26.69678 | -0.15078 |
| N  | 10.84102 | 26.82347 | 0.29123  |
| N  | 9.04306  | 26.5699  | -0.97603 |
| N  | 12.66792 | 22.11308 | -4.17497 |
| N  | 12.92804 | 23.72008 | -2.64333 |
| N  | 14.65004 | 20.62703 | -0.93098 |
| N  | 14.93876 | 22.59562 | 0.04962  |
| N  | 12.44279 | 26.54683 | 3.02602  |
| N  | 12.20805 | 27.04802 | 5.17804  |
| N  | 14.95042 | 28.69976 | 3.43587  |
| N  | 13.75699 | 30.195   | 4.58299  |
| N  | 16.64422 | 29.29802 | 0.89741  |
| N  | 16.71898 | 31.012   | -0.53    |
| N  | 13.14751 | 26.94168 | -2.96127 |
| N  | 12.55001 | 28.77301 | -4.08699 |
| C  | 10.34778 | 26.99764 | -0.9294  |
| C  | 9.82238  | 26.275   | 1.06069  |
| C  | 8.69473  | 26.10925 | 0.28759  |
| C  | 7.36496  | 25.56102 | 0.61601  |
| C  | 13.46194 | 23.12044 | -3.72314 |
| C  | 11.57259 | 22.04894 | -3.34071 |
| C  | 11.72994 | 23.04761 | -2.39382 |

|   |          |          |          |
|---|----------|----------|----------|
| C | 10.79509 | 23.40095 | -1.29496 |
| C | 15.31596 | 21.82223 | -0.96848 |
| C | 13.80569 | 20.64189 | 0.17123  |
| C | 13.98919 | 21.87066 | 0.77545  |
| C | 13.32991 | 22.439   | 1.98394  |
| C | 11.82056 | 27.34211 | 3.8904   |
| C | 13.25285 | 25.70808 | 3.77944  |
| C | 13.12194 | 26.00296 | 5.11919  |
| C | 13.79395 | 25.449   | 6.31296  |
| C | 13.97114 | 29.58997 | 3.35908  |
| C | 15.40325 | 28.73584 | 4.74856  |
| C | 14.68122 | 29.6637  | 5.47788  |
| C | 14.78501 | 30.121   | 6.884    |
| C | 16.43354 | 29.68924 | -0.36477 |
| C | 17.095   | 30.42796 | 1.57303  |
| C | 17.14007 | 31.5014  | 0.6959   |
| C | 17.51601 | 32.92799 | 0.886    |
| C | 13.29111 | 28.26567 | -3.03413 |
| C | 12.30579 | 26.57747 | -3.99555 |
| C | 11.93459 | 27.69617 | -4.69784 |
| C | 11.08801 | 27.77498 | -5.875   |
| H | 10.88485 | 27.39689 | -1.78358 |
| H | 9.96493  | 26.02313 | 2.10674  |
| H | 8.43726  | 26.59815 | -1.79054 |
| H | 7.12854  | 24.65413 | 0.0247   |
| H | 6.55238  | 26.29087 | 0.42904  |
| H | 7.31882  | 25.28051 | 1.68169  |
| H | 12.97541 | 21.40807 | -4.95937 |
| H | 14.407   | 23.3848  | -4.18949 |
| H | 10.77962 | 21.31657 | -3.46765 |
| H | 10.2158  | 24.31627 | -1.5172  |
| H | 10.07076 | 22.58483 | -1.12365 |
| H | 11.33028 | 23.58531 | -0.34526 |
| H | 14.75134 | 19.87286 | -1.60379 |
| H | 16.03426 | 22.08321 | -1.73991 |
| H | 13.16049 | 19.80707 | 0.42785  |
| H | 12.81148 | 23.38867 | 1.75231  |
| H | 14.06482 | 22.6485  | 2.784    |
| H | 12.58164 | 21.7365  | 2.39047  |
| H | 11.10683 | 28.12317 | 3.64461  |
| H | 13.89941 | 24.96786 | 3.32146  |
| H | 11.87978 | 27.5096  | 6.02037  |
| H | 14.42511 | 24.58913 | 6.03312  |
| H | 14.45336 | 26.19795 | 6.79559  |
| H | 13.07267 | 25.10164 | 7.07841  |
| H | 13.4034  | 29.83417 | 2.46537  |
| H | 16.2171  | 28.10108 | 5.09014  |
| H | 13.09005 | 30.93537 | 4.77659  |
| H | 15.06598 | 31.191   | 6.95267  |
| H | 13.8333  | 29.9995  | 7.43858  |
| H | 15.55749 | 29.54385 | 7.42013  |

|   |          |          |          |
|---|----------|----------|----------|
| H | 16.05601 | 29.05647 | -1.16197 |
| H | 17.34278 | 30.40378 | 2.63102  |
| H | 16.51978 | 31.56279 | -1.44881 |
| H | 18.44899 | 33.18824 | 0.34679  |
| H | 16.72902 | 33.60716 | 0.50466  |
| H | 17.67571 | 33.15415 | 1.95496  |
| H | 13.90266 | 28.91058 | -2.41183 |
| H | 12.0234  | 25.54705 | -4.18398 |
| H | 12.58505 | 29.75659 | -4.34739 |
| H | 10.70606 | 26.77554 | -6.14415 |
| H | 10.20945 | 28.43689 | -5.73133 |
| H | 11.62853 | 28.16492 | -6.76183 |
| H | 17.75833 | 25.30369 | 1.59519  |
| C | 12.16299 | 18.93701 | -6.787   |
| C | 13.59632 | 19.43191 | -6.54551 |
| O | 14.56594 | 18.76222 | -7.0102  |
| O | 13.722   | 20.53727 | -5.86164 |
| C | 14.196   | 33.28501 | -3.744   |
| C | 14.88901 | 32.08996 | -3.11738 |
| O | 14.28993 | 30.96104 | -3.09233 |
| O | 16.05912 | 32.33457 | -2.61277 |
| H | 11.65481 | 18.74735 | -5.8205  |
| H | 11.5754  | 19.71319 | -7.31524 |
| H | 13.91077 | 34.00392 | -2.95039 |
| H | 14.88664 | 33.81767 | -4.42342 |
| H | 13.28879 | 32.98596 | -4.29565 |
| H | 12.16479 | 18.01024 | -7.38428 |

1-hole S<sup>2-</sup> model with 2Asp (B3LYP; tzvp Cu<sub>4</sub>S<sub>2</sub>N<sub>7</sub>/sv; PCM=4.0)

-1 2

|    |          |          |          |
|----|----------|----------|----------|
| Cu | 16.73591 | 27.30878 | 1.36797  |
| Cu | 12.79885 | 26.76028 | 0.92329  |
| Cu | 13.74679 | 25.32584 | -1.65895 |
| Cu | 15.46661 | 24.56264 | 0.46862  |
| S  | 17.00975 | 25.22421 | 2.06888  |
| S  | 14.7622  | 26.63425 | -0.12484 |
| N  | 10.85395 | 26.81097 | 0.28287  |
| N  | 9.04307  | 26.5699  | -0.97602 |
| N  | 12.66787 | 22.11304 | -4.17495 |
| N  | 12.94545 | 23.69514 | -2.61931 |
| N  | 14.65005 | 20.62706 | -0.93096 |
| N  | 15.00249 | 22.56335 | 0.09664  |
| N  | 12.55001 | 26.6517  | 3.01721  |
| N  | 12.20805 | 27.04802 | 5.17806  |
| N  | 15.13372 | 28.93897 | 3.35403  |
| N  | 13.75699 | 30.19498 | 4.58296  |
| N  | 17.02782 | 29.21178 | 0.75296  |
| N  | 16.71891 | 31.01201 | -0.52993 |
| N  | 13.15548 | 26.93458 | -2.96631 |
| N  | 12.55002 | 28.77302 | -4.08699 |
| C  | 10.35289 | 26.99049 | -0.93317 |



|   |          |          |          |
|---|----------|----------|----------|
| C | 9.83597  | 26.26325 | 1.05488  |
| C | 8.70049  | 26.10449 | 0.28851  |
| C | 7.36496  | 25.56102 | 0.61601  |
| C | 13.47459 | 23.1036  | -3.70341 |
| C | 11.56439 | 22.05678 | -3.35039 |
| C | 11.73451 | 23.03998 | -2.38858 |
| C | 10.79513 | 23.40095 | -1.29501 |
| C | 15.37332 | 21.79159 | -0.92091 |
| C | 13.7727  | 20.66391 | 0.14551  |
| C | 13.99855 | 21.87157 | 0.77908  |
| C | 13.32991 | 22.43899 | 1.98394  |
| C | 11.84794 | 27.36821 | 3.88701  |
| C | 13.39404 | 25.83821 | 3.76406  |
| C | 13.18573 | 26.05988 | 5.11     |
| C | 13.79395 | 25.44901 | 6.31294  |
| C | 14.0463  | 29.68433 | 3.32782  |
| C | 15.58419 | 28.96937 | 4.66474  |
| C | 14.74957 | 29.74722 | 5.4492   |
| C | 14.78503 | 30.12099 | 6.88395  |
| C | 16.59945 | 29.65738 | -0.43271 |
| C | 17.45431 | 30.34184 | 1.44772  |
| C | 17.26487 | 31.4709  | 0.6593   |
| C | 17.51605 | 32.92799 | 0.88598  |
| C | 13.29353 | 28.25623 | -3.03526 |
| C | 12.31473 | 26.57491 | -4.00052 |
| C | 11.93783 | 27.69522 | -4.69989 |
| C | 11.08801 | 27.77498 | -5.875   |
| H | 10.89039 | 27.38541 | -1.78942 |
| H | 9.9861   | 26.00784 | 2.09961  |
| H | 8.4356   | 26.59946 | -1.78882 |
| H | 7.1202   | 24.66254 | 0.015    |
| H | 6.55724  | 26.29947 | 0.4408   |
| H | 7.32092  | 25.26835 | 1.67876  |
| H | 12.91968 | 21.493   | -5.03352 |
| H | 14.42193 | 23.36564 | -4.16631 |
| H | 10.75616 | 21.34504 | -3.49758 |
| H | 10.23773 | 24.33002 | -1.51593 |
| H | 10.05315 | 22.59734 | -1.13776 |
| H | 11.32624 | 23.56972 | -0.34031 |
| H | 14.73576 | 19.88139 | -1.61414 |
| H | 16.12998 | 22.03264 | -1.66184 |
| H | 13.08023 | 19.85685 | 0.36605  |
| H | 12.87332 | 23.42264 | 1.76365  |
| H | 14.04958 | 22.5966  | 2.80945  |
| H | 12.53499 | 21.76364 | 2.3472   |
| H | 11.09785 | 28.11605 | 3.64457  |
| H | 14.14284 | 25.20273 | 3.29561  |
| H | 11.82402 | 27.45278 | 6.02553  |
| H | 14.54263 | 24.69512 | 6.01773  |
| H | 14.31495 | 26.19836 | 6.94188  |
| H | 13.04228 | 24.94446 | 6.95294  |

|   |          |          |          |
|---|----------|----------|----------|
| H | 13.43236 | 29.88732 | 2.45265  |
| H | 16.47555 | 28.42552 | 4.97273  |
| H | 12.99251 | 30.81908 | 4.81911  |
| H | 14.87287 | 31.21678 | 7.0314   |
| H | 13.87661 | 29.79291 | 7.43003  |
| H | 15.653   | 29.65293 | 7.37992  |
| H | 16.1888  | 29.03399 | -1.22114 |
| H | 17.84188 | 30.27557 | 2.46049  |
| H | 16.45652 | 31.56612 | -1.423   |
| H | 18.25635 | 33.33484 | 0.16869  |
| H | 16.58946 | 33.52293 | 0.76424  |
| H | 17.9025  | 33.10585 | 1.90519  |
| H | 13.90351 | 28.89371 | -2.40472 |
| H | 12.03578 | 25.54348 | -4.19275 |
| H | 12.59168 | 29.75814 | -4.34077 |
| H | 10.71237 | 26.77391 | -6.14831 |
| H | 10.20415 | 28.42996 | -5.72737 |
| H | 11.62276 | 28.17252 | -6.76254 |
| C | 12.163   | 18.93703 | -6.787   |
| C | 13.42821 | 19.78692 | -6.98195 |
| O | 14.26187 | 19.44778 | -7.87501 |
| O | 13.55497 | 20.82272 | -6.20122 |
| C | 14.19601 | 33.285   | -3.744   |
| C | 14.86178 | 32.06629 | -3.14697 |
| O | 14.2432  | 30.94958 | -3.15968 |
| O | 16.02686 | 32.28712 | -2.62439 |
| H | 12.09768 | 18.58065 | -5.73994 |
| H | 11.2597  | 19.54972 | -6.97801 |
| H | 13.88638 | 33.97103 | -2.93017 |
| H | 14.90925 | 33.84405 | -4.37769 |
| H | 13.30456 | 33.01609 | -4.33636 |
| H | 12.16522 | 18.07078 | -7.46931 |

2-hole S<sup>2-</sup> model with 2Asp (B3LYP; tzvp Cu<sub>4</sub>S<sub>2</sub>N<sub>7</sub>/sv; PCM=4.0)

0 1

|    |          |          |          |
|----|----------|----------|----------|
| Cu | 16.06254 | 27.52478 | 1.66593  |
| Cu | 12.73057 | 26.7474  | 0.97961  |
| Cu | 13.6872  | 25.37735 | -1.71368 |
| Cu | 15.2112  | 24.56406 | 0.31856  |
| S  | 16.50782 | 25.38445 | 2.02254  |
| S  | 14.67651 | 26.65154 | -0.09578 |
| N  | 10.84118 | 26.82428 | 0.28876  |
| N  | 9.04298  | 26.56985 | -0.976   |
| N  | 12.6679  | 22.11302 | -4.17509 |
| N  | 12.93122 | 23.7185  | -2.64288 |
| N  | 14.65007 | 20.62705 | -0.93097 |
| N  | 14.91163 | 22.60178 | 0.02662  |
| N  | 12.45912 | 26.56582 | 3.02625  |
| N  | 12.20801 | 27.04799 | 5.17799  |
| N  | 14.96788 | 28.71678 | 3.42953  |
| N  | 13.757   | 30.19499 | 4.58299  |

|   |          |          |          |
|---|----------|----------|----------|
| N | 16.60018 | 29.3127  | 0.90089  |
| N | 16.719   | 31.01201 | -0.53    |
| N | 13.12933 | 26.95565 | -2.93267 |
| N | 12.54999 | 28.77301 | -4.08701 |
| C | 10.34597 | 26.99966 | -0.9314  |
| C | 9.82394  | 26.27366 | 1.05993  |
| C | 8.69579  | 26.10779 | 0.28755  |
| C | 7.365    | 25.56108 | 0.61601  |
| C | 13.4621  | 23.12071 | -3.72621 |
| C | 11.57457 | 22.04826 | -3.33896 |
| C | 11.7333  | 23.04569 | -2.39083 |
| C | 10.79523 | 23.4011  | -1.29482 |
| C | 15.29644 | 21.8283  | -0.98689 |
| C | 13.81467 | 20.6351  | 0.17832  |
| C | 13.98124 | 21.87148 | 0.77058  |
| C | 13.32979 | 22.43894 | 1.98395  |
| C | 11.82204 | 27.34808 | 3.89287  |
| C | 13.27558 | 25.72894 | 3.7756   |
| C | 13.13141 | 26.01093 | 5.11661  |
| C | 13.794   | 25.449   | 6.31298  |
| C | 13.98021 | 29.59658 | 3.35643  |
| C | 15.41752 | 28.7514  | 4.74227  |
| C | 14.68601 | 29.66887 | 5.47603  |
| C | 14.78501 | 30.121   | 6.884    |
| C | 16.41493 | 29.69683 | -0.36666 |
| C | 17.05279 | 30.43747 | 1.58197  |
| C | 17.12525 | 31.50451 | 0.69979  |
| C | 17.516   | 32.928   | 0.886    |
| C | 13.28458 | 28.27824 | -3.02613 |
| C | 12.28472 | 26.5833  | -3.96604 |
| C | 11.92522 | 27.69503 | -4.68684 |
| C | 11.08799 | 27.77501 | -5.87502 |
| H | 10.88001 | 27.4021  | -1.7855  |
| H | 9.96804  | 26.02197 | 2.10581  |
| H | 8.43548  | 26.60005 | -1.78928 |
| H | 7.12602  | 24.65733 | 0.02115  |
| H | 6.55435  | 26.29398 | 0.43308  |
| H | 7.31984  | 25.2764  | 1.68055  |
| H | 12.95254 | 21.44318 | -5.00185 |
| H | 14.4028  | 23.38916 | -4.19901 |
| H | 10.77924 | 21.3187  | -3.46715 |
| H | 10.21627 | 24.31561 | -1.52132 |
| H | 10.07063 | 22.58519 | -1.12435 |
| H | 11.32671 | 23.58668 | -0.3432  |
| H | 14.76244 | 19.86498 | -1.59299 |
| H | 16.00684 | 22.09386 | -1.76372 |
| H | 13.18861 | 19.78992 | 0.44778  |
| H | 12.78779 | 23.37573 | 1.75345  |
| H | 14.07392 | 22.67514 | 2.7673   |
| H | 12.60411 | 21.72434 | 2.40976  |
| H | 11.10091 | 28.12321 | 3.65     |

|   |          |          |          |
|---|----------|----------|----------|
| H | 13.96385 | 25.03125 | 3.31005  |
| H | 11.86792 | 27.49691 | 6.0225   |
| H | 14.45261 | 24.61215 | 6.02692  |
| H | 14.42434 | 26.20356 | 6.82489  |
| H | 13.06705 | 25.06604 | 7.05608  |
| H | 13.40977 | 29.84014 | 2.46393  |
| H | 16.23557 | 28.12102 | 5.08267  |
| H | 13.08131 | 30.92645 | 4.77994  |
| H | 15.05522 | 31.1935  | 6.95812  |
| H | 13.83468 | 29.9873  | 7.43836  |
| H | 15.56322 | 29.5491  | 7.41756  |
| H | 16.04793 | 29.06424 | -1.16873 |
| H | 17.28152 | 30.41295 | 2.64359  |
| H | 16.52537 | 31.56717 | -1.44985 |
| H | 18.47554 | 33.16479 | 0.38396  |
| H | 16.75696 | 33.61189 | 0.45991  |
| H | 17.63321 | 33.16786 | 1.95732  |
| H | 13.90084 | 28.93324 | -2.41796 |
| H | 11.99586 | 25.55244 | -4.14076 |
| H | 12.58805 | 29.75335 | -4.35903 |
| H | 11.6451  | 28.1455  | -6.75949 |
| H | 10.69138 | 26.77936 | -6.13646 |
| H | 10.2209  | 28.45394 | -5.74449 |
| C | 12.16302 | 18.93698 | -6.78699 |
| C | 13.53922 | 19.61796 | -6.76676 |
| O | 14.47817 | 19.12845 | -7.46099 |
| O | 13.65052 | 20.68522 | -6.0222  |
| C | 14.196   | 33.28499 | -3.744   |
| C | 14.88755 | 32.09734 | -3.10133 |
| O | 14.28743 | 30.96893 | -3.05928 |
| O | 16.05909 | 32.34631 | -2.60192 |
| H | 11.85403 | 18.66249 | -5.75897 |
| H | 11.39839 | 19.63579 | -7.18012 |
| H | 13.92045 | 34.0193  | -2.96128 |
| H | 14.88485 | 33.80162 | -4.4374  |
| H | 13.28357 | 32.98086 | -4.28401 |
| H | 12.18574 | 18.03174 | -7.41585 |

2-hole SH<sup>-</sup> model with 2Asp (B3LYP; tzvp Cu<sub>4</sub>S<sub>2</sub>N<sub>7</sub>/sv; PCM=4.0)

|     |          |          |          |
|-----|----------|----------|----------|
| l 1 |          |          |          |
| Cu  | 15.76265 | 27.66164 | 1.74807  |
| Cu  | 12.72241 | 26.75078 | 0.99493  |
| Cu  | 13.66954 | 25.40454 | -1.76279 |
| Cu  | 15.11444 | 24.58004 | 0.29396  |
| S   | 16.40051 | 25.46064 | 2.21048  |
| S   | 14.62762 | 26.69306 | -0.15971 |
| N   | 10.85238 | 26.77985 | 0.27818  |
| N   | 9.04299  | 26.56986 | -0.976   |
| N   | 12.66792 | 22.11295 | -4.17504 |
| N   | 12.92263 | 23.74294 | -2.66624 |
| N   | 14.65006 | 20.62707 | -0.93097 |

|   |          |          |          |
|---|----------|----------|----------|
| N | 14.87461 | 22.62157 | -0.00051 |
| N | 12.4478  | 26.5512  | 3.02729  |
| N | 12.208   | 27.04799 | 5.17798  |
| N | 14.9326  | 28.69181 | 3.44185  |
| N | 13.757   | 30.195   | 4.583    |
| N | 16.41388 | 29.35958 | 0.92171  |
| N | 16.719   | 31.01201 | -0.53    |
| N | 13.13618 | 26.95332 | -2.94886 |
| N | 12.54998 | 28.77305 | -4.08703 |
| C | 10.34925 | 26.98457 | -0.93603 |
| C | 9.83584  | 26.22594 | 1.04828  |
| C | 8.70048  | 26.08911 | 0.2816   |
| C | 7.36501  | 25.56107 | 0.61601  |
| C | 13.45241 | 23.13555 | -3.74992 |
| C | 11.58562 | 22.0451  | -3.32609 |
| C | 11.7353  | 23.05564 | -2.39175 |
| C | 10.79525 | 23.40109 | -1.29489 |
| C | 15.26272 | 21.84388 | -1.01444 |
| C | 13.83416 | 20.62718 | 0.19208  |
| C | 13.97577 | 21.87412 | 0.76729  |
| C | 13.3298  | 22.43893 | 1.98395  |
| C | 11.82532 | 27.34954 | 3.89253  |
| C | 13.24617 | 25.70137 | 3.78294  |
| C | 13.11533 | 25.99828 | 5.12171  |
| C | 13.79401 | 25.449   | 6.31299  |
| C | 13.96022 | 29.59599 | 3.36183  |
| C | 15.38854 | 28.71751 | 4.75482  |
| C | 14.6751  | 29.65502 | 5.4804   |
| C | 14.785   | 30.121   | 6.884    |
| C | 16.33101 | 29.72423 | -0.36525 |
| C | 16.88271 | 30.47782 | 1.61299  |
| C | 17.06896 | 31.51606 | 0.71355  |
| C | 17.516   | 32.928   | 0.886    |
| C | 13.28781 | 28.28087 | -3.03136 |
| C | 12.29147 | 26.58049 | -3.98254 |
| C | 11.92854 | 27.69627 | -4.69218 |
| C | 11.08799 | 27.775   | -5.87501 |
| H | 10.87686 | 27.40356 | -1.78577 |
| H | 9.98214  | 25.95449 | 2.08864  |
| H | 8.42664  | 26.62681 | -1.78172 |
| H | 7.09877  | 24.67909 | 0.00108  |
| H | 6.56801  | 26.3154  | 0.46392  |
| H | 7.32897  | 25.24983 | 1.67316  |
| H | 12.97174 | 21.40339 | -4.9854  |
| H | 14.38528 | 23.41024 | -4.2346  |
| H | 10.80014 | 21.3019  | -3.43452 |
| H | 10.20818 | 24.31088 | -1.51851 |
| H | 10.07743 | 22.57872 | -1.13057 |
| H | 11.32101 | 23.58354 | -0.33908 |
| H | 14.77138 | 19.85998 | -1.58661 |
| H | 15.95073 | 22.11618 | -1.8088  |

|   |          |          |          |
|---|----------|----------|----------|
| H | 13.2351  | 19.76973 | 0.4831   |
| H | 12.77809 | 23.37142 | 1.7567   |
| H | 14.07468 | 22.66865 | 2.7692   |
| H | 12.60801 | 21.72252 | 2.41203  |
| H | 11.11443 | 28.13309 | 3.64738  |
| H | 13.87214 | 24.94021 | 3.33323  |
| H | 11.87004 | 27.50238 | 6.0213   |
| H | 14.40297 | 24.57138 | 6.03972  |
| H | 14.47338 | 26.19361 | 6.77354  |
| H | 13.07707 | 25.12993 | 7.0936   |
| H | 13.39854 | 29.85166 | 2.46836  |
| H | 16.19606 | 28.07537 | 5.09582  |
| H | 13.0962  | 30.94107 | 4.77883  |
| H | 15.09134 | 31.18412 | 6.94058  |
| H | 13.82783 | 30.02797 | 7.43265  |
| H | 15.54111 | 29.53097 | 7.42843  |
| H | 15.97744 | 29.09807 | -1.17749 |
| H | 17.04616 | 30.46558 | 2.68646  |
| H | 16.5337  | 31.57666 | -1.46492 |
| H | 18.52973 | 33.09297 | 0.47032  |
| H | 16.83692 | 33.62445 | 0.35917  |
| H | 17.5427  | 33.20787 | 1.95318  |
| H | 13.89894 | 28.93877 | -2.4205  |
| H | 12.00529 | 25.55092 | -4.16461 |
| H | 12.57212 | 29.75671 | -4.35046 |
| H | 11.64079 | 28.15007 | -6.75983 |
| H | 10.69401 | 26.77902 | -6.13762 |
| H | 10.21979 | 28.45067 | -5.73919 |
| H | 17.5205  | 25.51144 | 1.45287  |
| C | 12.163   | 18.93701 | -6.78699 |
| C | 13.56828 | 19.53805 | -6.65051 |
| O | 14.53666 | 18.99106 | -7.25158 |
| O | 13.68061 | 20.60859 | -5.90517 |
| C | 14.196   | 33.28499 | -3.744   |
| C | 14.86514 | 32.10786 | -3.05845 |
| O | 14.24934 | 30.98979 | -2.97489 |
| O | 16.04568 | 32.34964 | -2.57072 |
| H | 11.75549 | 18.67927 | -5.78946 |
| H | 11.4739  | 19.67774 | -7.23821 |
| H | 13.97808 | 34.07327 | -2.99714 |
| H | 14.87939 | 33.73288 | -4.48877 |
| H | 13.25545 | 32.98578 | -4.23547 |
| H | 12.18719 | 18.03244 | -7.41614 |

## Electronic Supporting Information References

1. S. Dell'Acqua, S. R. Pauleta, J. J. G. Moura and I. Moura, *Philosophical Transactions of the Royal Society B-Biological Sciences*, 2012, **367**, 1204-1212.
2. E. M. Johnston, S. Dell'Acqua, S. Ramos, S. R. Pauleta, I. Moura and E. I. Solomon, *Journal of the American Chemical Society*, 2014, **136**, 614-617.
3. T. Rasmussen, B. C. Berks, J. N. Butt and A. J. Thomson, *Biochemical Journal*, 2002, **364**, 807-815.
4. M. Prudencio, A. S. Pereira, P. Tavares, S. Besson, I. Cabrito, K. Brown, B. Samyn, B. Devreese, J. Van Beeumen, F. Rusnak, G. Fauque, J. J. G. Moura, M. Tegoni, C. Cambillau and I. Moura, *Biochemistry*, 2000, **39**, 3899-3907.
5. A. Pomowski, W. G. Zumft, P. M. H. Kroneck and O. Einsle, *Nature*, 2011, **477**, 234-U143.
6. K. Brown, K. Djinovic-Carugo, T. Haltia, I. Cabrito, M. Saraste, J. J. G. Moura, I. Moura, M. Tegoni and C. Cambillau, *Journal of Biological Chemistry*, 2000, **275**, 41133-41136.
7. S. Ghosh, S. I. Gorelsky, S. D. George, J. M. Chan, I. Cabrito, D. M. Dooley, J. J. G. Moura, I. Moura and E. I. Solomon, *Journal of the American Chemical Society*, 2007, **129**, 3955-3965.
8. M. J. Frisch, G. W. Trucks, H. B. Schlegel, G. E. Scuseria, M. A. Robb, J. R. Cheeseman, G. Scalmani, V. Barone, B. Mennucci, G. A. Petersson, H. Nakatsuji, M. Caricato, X. Li, H. P. Hratchian, A. F. Izmaylov, J. Bloino, G. Zheng, J. L. Sonnenberg, M. Hada, M. Ehara, K. Toyota, R. Fukuda, J. Hasegawa, M. Ishida, T. Nakajima, Y. Honda, O. Kitao, H. Nakai, T. Vreven, J. A. Montgomery Jr., J. E. Peralta, F. Ogliaro, M. J. Bearpark, J. Heyd, E. N. Brothers, K. N. Kudin, V. N. Staroverov, R. Kobayashi, J. Normand, K. Raghavachari, A. P. Rendell, J. C. Burant, S. S. Iyengar, J. Tomasi, M. Cossi, N. Rega, N. J. Millam, M. Klene, J. E. Knox, J. B. Cross, V. Bakken, C. Adamo, J. Jaramillo, R. Gomperts, R. E. Stratmann, O. Yazyev, A. J. Austin, R. Cammi, C. Pomelli, J. W. Ochterski, R. L. Martin, K. Morokuma, V. G. Zakrzewski, G. A. Voth, P. Salvador, J. J. Dannenberg, S. Dapprich, A. D. Daniels, Ö. Farkas, J. B. Foresman, J. V. Ortiz, J. Cioslowski and D. J. Fox, Gaussian, Inc., Wallingford, CT, USA, 2009.
9. M. D. Hanwell, D. E. Curtis, D. C. Lonie, T. Vandermeersch, E. Zurek and G. R. Hutchison, *Journal of Cheminformatics*, 2012, **4**.
10. W. Humphrey, A. Dalke and K. Schulten, *Journal of Molecular Graphics*, 1996, **14**, 33-38.
11. A. L. Tenderholt, Version 2.3.2 edn.
12. I. Bar-Nahum, A. K. Gupta, S. M. Huber, M. Z. Ertem, C. J. Cramer and W. B. Tolman, *Journal of the American Chemical Society*, 2009, **131**, 2812-+.
13. F. Neese, *Wiley Interdisciplinary Reviews-Computational Molecular Science*, 2012, **2**, 73-78.
